1 **Title:** Male age and *Wolbachia* dynamics: Determining how fast and why bacterial densities and  
2 cytoplasmic incompatibility strengths vary

3

4 **Short title:** Male age and *Wolbachia* dynamics

5

6 **Authors:** J. Dylan Shropshire<sup>1</sup>, Emily Hamant<sup>1</sup>, and Brandon S. Cooper<sup>1</sup>

7 <sup>1</sup>Division of Biological Sciences, University of Montana, Missoula, MT 59812, USA

8

9 \*Correspondence to:

10 J. Dylan Shropshire, Missoula, MT, 59801, 423.930.6292, shropxp@gmail.com

11

12 **ORCID iD:** J. Dylan Shropshire (<https://orcid.org/0000-0003-4221-2178>), Emily Hamant

13 (<https://orcid.org/0000-0001-5743-1731>), Brandon S. Cooper ([https://orcid.org/0000-0002-8269-](https://orcid.org/0000-0002-8269-7731)  
14 7731)

15

16 **Author contributions:**

17 JDS roles: Conceptualization, Data curation, Formal Analysis, Funding acquisition,

18 Investigation, Methodology, Supervision, Validation, Visualization, Writing - original draft, Writing

19 – review & editing. EH roles: Investigation, Validation, Writing – review & editing. BSC roles:

20 Project administration, Conceptualization, Funding acquisition, Supervision, Writing – original  
21 draft, Writing – review & editing.

22

23 **Keywords:** aging, immunity, symbiosis, *wMel*, *wRi*, *Drosophila*

24

## 25 **Abstract**

26           Endosymbiotic *Wolbachia* bacteria infect divergent arthropod and nematode hosts. Many  
27 strains cause cytoplasmic incompatibility (CI) that kills uninfected embryos fertilized  
28 by *Wolbachia*-modified sperm. Infected embryos are protected from CI,  
29 promoting *Wolbachia* spread to high equilibrium frequencies balanced by imperfect maternal  
30 transmission. CI strength varies widely in nature and tends to decrease as males age.  
31 Understanding the causes of CI-strength variation is crucial to explain *Wolbachia* prevalence in  
32 host populations. Here, we investigate how fast and why CI strength decreases with male age in  
33 two model systems: *wMel* in *Drosophila melanogaster* and *wRi* in *D. simulans*. Average *wMel* CI  
34 strength decreases rapidly (19%/ day), and *wRi* CI strength decreases slowly (6%/ day) as  
35 males age; thus, within three days, *wMel*-infected males do not cause CI, whereas twelve-day-  
36 old *wRi*-infected males still cause minor, yet significant, CI. We tested if reductions in  
37 *Wolbachia* densities or CI gene expression as males age could explain this pattern. Indeed, *wRi*  
38 densities and CI gene expression decrease in testes as males age, but *wMel* densities and CI  
39 gene expression surprisingly increase with male age as CI strength decreases. Phage WO lytic  
40 activity and *wMel* Octomom copy number—an ampliconic gene region that influences *wMel*  
41 proliferation—do not explain age-dependent *Wolbachia* densities. However, the expression of  
42 Relish, an essential gene in the *Drosophila* immune deficiency pathway, strongly correlates  
43 with *wMel* densities. Together, these results suggest that testes-wide *Wolbachia* density and CI  
44 gene expression are insufficient to explain age-dependent CI strength across strains and  
45 that *Wolbachia* density is variably impacted by male age across *Wolbachia*-host associations.  
46 We hypothesize that host immunity may underlie variation in age-dependent density dynamics.  
47 More broadly, the rapid decline of *wMel* CI strength during the first week of *D. melanogaster* life  
48 likely contributes to *wMel* frequency variation observed on several continents.

49

## 50 Introduction

51 Reproductive parasites manipulate host reproduction to facilitate their maternal  
52 transmission. These endosymbiotic microbes may kill or feminize males or induce  
53 parthenogenesis to bias sex ratios in favor of females [1]. More frequently, reproductive parasites  
54 cause cytoplasmic incompatibility (CI) that reduces embryonic viability when aposymbiotic  
55 females mate with symbiont-bearing males (**Fig. 1A**) [2]. Females harboring a comparable  
56 symbiont are compatible with CI-causing symbiotic males of the same strain, providing symbiont-  
57 bearing females a relative advantage that encourages symbiont spread to high frequencies in  
58 host populations [3–6]. Divergent *Cardinium* [7], *Rickettsiella* [8], *Meseneit* [9], and *Wolbachia* [10]  
59 endosymbionts cause CI. Of these, *Wolbachia* are the most common, infecting 40-65% of  
60 arthropod species [11,12]. *Wolbachia* cause CI in at least ten arthropod orders [2], and pervasive  
61 CI directly contributes to *Wolbachia* spread and its status as one of the most common  
62 endosymbionts in nature.

63 Within host populations, *Wolbachia* frequencies are governed by their effects on host  
64 fitness [13–16], the efficiency of maternal transmission [17–19], and CI strength (% embryonic  
65 death) [3,5]. CI strength varies from very weak to very strong and produces relatively low and high  
66 infection frequencies, respectively. For example, *wYak* in *Drosophila yakuba* causes weak CI  
67 (~15%) and tends to occur at intermediate and often variable frequencies (~40-88%) in west  
68 Africa [18,20]. Conversely, *wRi* in *D. simulans* causes strong CI (~90%) and occurs at high and  
69 stable frequencies (e.g., ~93% globally) [4,21–23]. In *D. melanogaster*, *wMel* CI strength is  
70 relatively weak [24–26], contributing to infection frequencies that vary considerably on multiple  
71 continents [27–31]. In contrast, *wMel* usually causes complete CI (no eggs hatch) in transinfected  
72 *Aedes aegypti* mosquitoes [32–35]. Vector control groups use this strong CI to either suppress  
73 mosquito populations through the release of *wMel*-infected males [36–40] or to drive pathogen-  
74 blocking *wMel* to high and stable frequencies to inhibit pathogen spread [32,41,42].

75           Despite CI's importance for explaining *Wolbachia* prevalence in natural systems and  
76 reducing human disease transmission in transinfected mosquito systems, the mechanistic basis  
77 of CI-strength variation remains unresolved. Two hypotheses are plausible. First, the bacterial  
78 density model predicts that CI is strong when bacterial density is high (**Fig. 1B**) [43]. Indeed,  
79 *Wolbachia* densities positively covary with CI strength across *Drosophila-Wolbachia* associations  
80 [44,45] and with variable CI within strains [33,34,46–52]. Second, the CI gene expression  
81 hypothesis predicts that higher CI gene expression contributes to stronger CI (**Fig. 1B**) [53]. In  
82 *Drosophila*, two genes (*cifA* and *cifB*) associated with *Wolbachia*'s temperate bacteriophage (WO)  
83 induce CI when expressed in testes [53–57], and one gene (*cifA*) rescues CI when expressed in  
84 ovaries [56–58]. CI strength covaries with transgenic *cif* expression in *D. melanogaster* [53,57],  
85 and natural *cif* expression covaries with CI strength in *Habrobracon* ectoparasitoid wasps [59].  
86 Bacterial density may explain CI strength via *cif* expression but may not perfectly align with CI  
87 strength since *Wolbachia* variably express *cifs* across conditions that impact CI strength [53].  
88 Thus, the bacterial density and *cif* expression hypotheses are not mutually exclusive. It remains  
89 unknown if *cif* expression is responsible for CI-strength variation and if it covaries with *Wolbachia*  
90 density in natural *Drosophila-Wolbachia* associations.

91           If symbiont density is a crucial factor governing CI strength, what governs the change in  
92 density? There are several plausible drivers of *Wolbachia* density variation. First, phage WO is a  
93 temperate phage capable of cell lysis in some *Wolbachia* strains [59–62]. Lytic phage form  
94 particles that burst through the bacterial cell membrane, killing the bacterial host. The phage  
95 density model proposes that as phage densities increase, *Wolbachia* densities decrease (**Fig.**  
96 **1B**) [46]. Temperature-induced phage lysis covaries with lower *Wolbachia* densities and CI  
97 strength in some parasitoid wasps [46,59], though it is unknown if phage lysis influences  
98 *Wolbachia* densities in any other systems. Second, *wMel Wolbachia* have a unique ampliconic  
99 gene region composed of eight genes termed “Octomom” [63,64]. Octomom copy number varies  
100 among *wMel Wolbachia* between host generations and positively covaries with *Wolbachia*

101 densities (**Fig. 1B**), but effects of Octomom-dependent *Wolbachia* densities on CI have not been  
102 investigated. Third, theory predicts that selection favors the evolution of host suppressors [6], as  
103 observed for male killing [65,66]. Indeed, CI strength varies considerably across host  
104 backgrounds [20,25,35,67], supporting a role for host genotype in CI-strength variation. The  
105 genetic underpinnings and mechanistic consequences of host suppression remain unknown, but  
106 two models have been proposed [2]. The defensive model suggests that host CI targets diverge  
107 to prevent interaction with *cif* products, and the offensive model suggests that host products  
108 directly interfere with *Wolbachia* density or the proper expression of *cif* products (e.g., through  
109 immune regulation) (**Fig. 1B**). Only a taxon-restricted gene of *Nasonia* wasps has been  
110 functionally determined to contribute to *Wolbachia* density variation [68]; thus considerable work  
111 is necessary to uncover host determinants of variation in *Wolbachia* density. Since *Wolbachia*  
112 densities significantly contribute to several phenotypes [47,69], investigation of the causes of  
113 *Wolbachia* density variation are sorely needed.

114 CI strength within *Wolbachia*-host systems covaries with several factors, including  
115 temperature [25,33,34,46,59], male mating rate [70,71], male development time [72], rearing  
116 density [72], nutrition [73], paternal grandmother age [26], and male age [3,16,23,25,70]. Changes  
117 in CI strength with male age are particularly notable. Older males cause weaker CI in *wMel*-  
118 infected *D. melanogaster* [25] and *wRi*-infected *D. simulans* [3,16,23]. Age-dependent CI seems  
119 particularly strong for *wMel* [3,16,23,25], although the precise rates of CI-strength decline have  
120 not been estimated. While several factors might contribute to age-dependent CI strength, the  
121 precise mechanistic underpinnings of this phenotype remain unknown.

122 Here, we investigate how fast and why *Wolbachia* densities and CI strengths vary with  
123 male age in two model *Wolbachia* that diverged 0.6-6 million years ago [74]: *wMel* in *D.*  
124 *melanogaster* and *wRi* in *D. simulans*. First, how fast does CI strength decrease with male age?  
125 Second, is *Wolbachia* density consistently correlated with age-related CI strength, as predicted  
126 by the bacterial density model? If so, does phage WO lysis, Octomom copy number, or host

127 immune gene expression correlate with density? Third, does *cif* expression consistently correlate  
128 with CI strengths and *Wolbachia* densities, as predicted by the CI gene expression model? This  
129 study is the first to test the *cif* expression hypothesis in either system with age and is the highest  
130 resolution investigation of *Wolbachia* density variation across age to date. Our results suggest  
131 that testes-wide *Wolbachia* densities and *cif* expression alone do not explain age-dependent CI-  
132 strength relationships across *Wolbachia*-host associations. While phage WO and Octomom copy  
133 number do not covary with the age-dependent *Wolbachia* density variation we observe, immune  
134 expression in *D. melanogaster* positively correlates with *wMel* densities. We discuss how these  
135 data contribute to our understanding of the causes of age-dependent CI strength and *Wolbachia*  
136 density variation and the consequences for *Wolbachia* prevalence in nature.

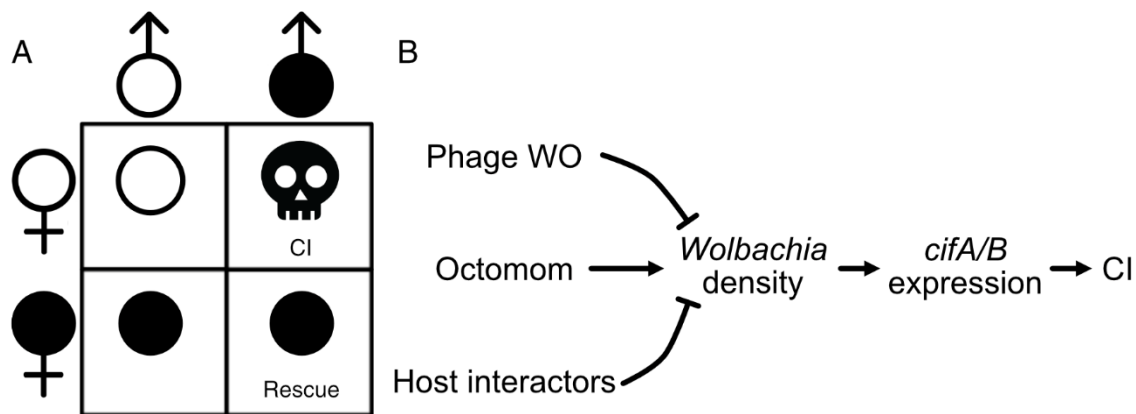

137  
138 **Figure 1. CI crossing relationships and potential causes of CI-strength variation.** (A) CI  
139 causes embryonic death when infected males (filled symbol) mate with uninfected females  
140 (unfilled symbol). Infected females maternally transmit *Wolbachia* and can rescue CI. (B)  
141 Schematic representation of factors that putatively impact *Wolbachia* densities, CI gene  
142 expression, and CI strength.

143

## 144 Results

### 145 *How much does CI strength vary with age?*

146 CI manifests as embryonic lethality (**Fig. 1A**). As such, we measured CI strength as the  
147 percent of embryos that hatch from a mating pair's clutch of offspring. Our experiments use  
148 males of different ages to test the impact of male age on CI strength. Here, we define age as

149 days since eclosion where males paired with females the day they eclosed are considered 0-  
150 days-old. For wMel, we measured CI strength daily across the first three days of male age (**Fig.**  
151 **2A**) and separately every two days across the first eight days of male age (**Fig. 2B**). This design  
152 enabled us to determine the rate of CI decline and the ages where males no longer cause  
153 significant CI. Crossing uninfected *D. melanogaster* females and males yields high levels of  
154 compatibility (**Fig. 2A**; 95% confidence interval of the mean = 74 - 93%). Young 0-day-old wMel-  
155 infected males induce strong CI when mated with uninfected females (95% interval = 9 - 27%).  
156 wMel-infected females significantly rescue CI caused by infected 0-day-old males (95% interval  
157 = 87 - 92%,  $P = 1.74E-12$ ). Crosses using older 1- (95% interval = 31 - 51%), 2- (95% interval =  
158 53 - 73%), and 3-day-old (95% interval = 69 - 83%) infected males trend toward progressively  
159 weaker CI (**Fig. 2A**). Average wMel CI strength decreases daily by 19.3%: 22.8% from 0- to 1-  
160 day-old males, 21.8% from 1- to 2-day-old, and 13.4% from 2- to 3-day-old. Crosses between  
161 uninfected females and 3-day-old males (95% interval = 69 - 83%) do not cause significant CI,  
162 with egg hatch similar to the compatible uninfected (95% interval = 74 - 93%;  $P = 0.35$ ) and  
163 rescue (95% interval = 87 - 92%;  $P = 0.19$ ) crosses. This highlights the rapid decline of wMel CI  
164 strength with *D. melanogaster* male age.

165 In the age group that includes older males (**Fig. 2B**), the uninfected cross also yields  
166 high compatibility (95% interval = 72 - 88%). 0-day-old infected males cause strong CI when  
167 crossed with uninfected females (95% interval = 8 - 15%), and infected females significantly  
168 rescue 0-day-old CI (95% interval = 83 - 91%;  $P = 2.51E-12$ ). Older 2- (95% interval = 59 -  
169 73%), 4- (95% interval = 66 - 83%), 6- (95% interval = 76 - 92%), and 8-day-old (95% interval =  
170 77 - 91%) infected males cause weaker CI as males age (**Fig 2B**). CI crosses using 4-day-old  
171 or older males do not significantly differ in egg hatch from the compatible uninfected cross ( $P =$   
172 1 in all cases). These data suggest that average wMel CI strength decreases by approximately  
173 19.3% each day as *D. melanogaster* males age, but this rate of decrease slows each day, such  
174 that CI is no longer statistically detectable once males are 3-days-old.

175           Next, we assess age-dependent CI in *w*Ri-infected *D. simulans* (**Fig. 2C**). As expected,  
176 uninfected *D. simulans* females and males are compatible (95% interval = 74 - 94%). Young 0-  
177 day-old *w*Ri-infected males cause strong CI when mated with uninfected females (95% interval  
178 = 0 - 1%), and infected females significantly rescue 0-day-old CI (95% interval = 59 - 84%;  $P =$   
179 1.83E-10). Older 4- (95% interval = 21 - 39%), 8- (95% interval = 54 - 64%), and 12-day-old  
180 (95% interval = 64 - 82%) infected males induce progressively weaker CI as males age.  
181 Average *w*Ri CI strength decreases by about 6.0% per day: 29.1% (7.3%/ day) from 0-day-old  
182 to 4-day-old males, 29.0% (7.3%/ day) from 4-day-old to 8-day-old, and 14.0% (3.5%/ day) from  
183 8-day-old to 12-day-old. These data support a strong effect of *D. simulans* male age on *w*Ri CI  
184 strength, but the daily decrease is more than three times slower than what we observe for *w*Mel  
185 CI strength decline as *D. melanogaster* males age.  
186



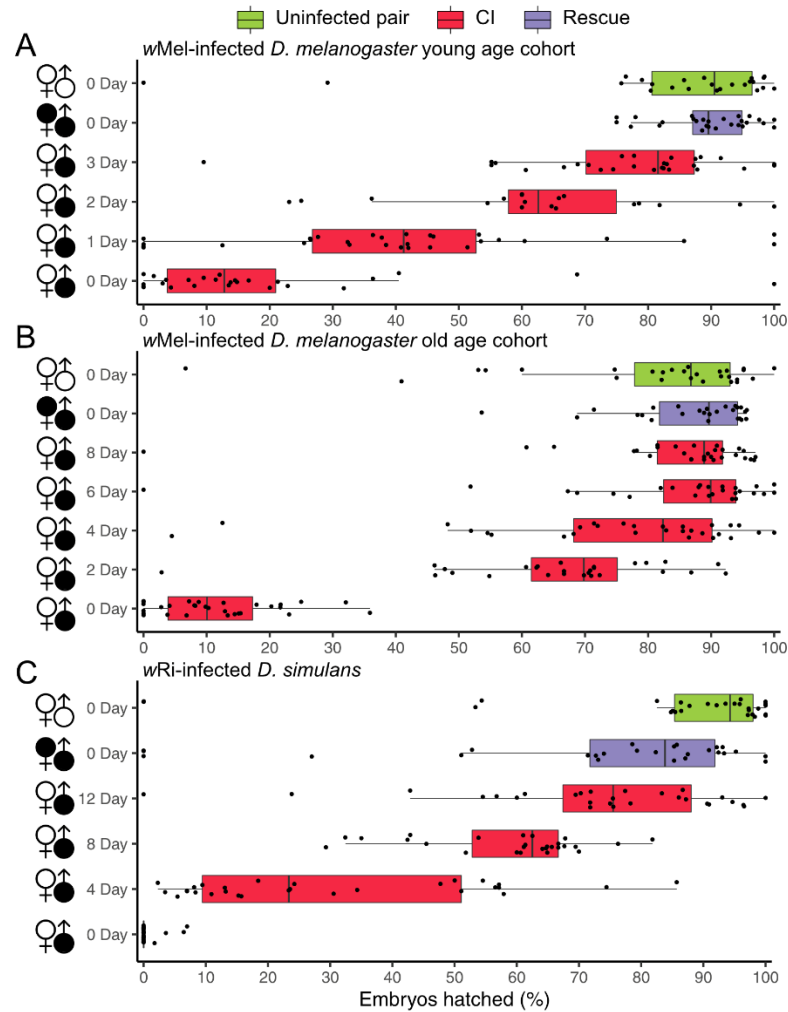

187

188 **Figure 2. CI strength decreases as males age.** (A) Hatch rate displaying CI strength with 0-,  
 189 1-, 2-, and 3-day-old wMel-infected *D. melanogaster* males. (B) Hatch rate displaying CI  
 190 strength with 0-, 2-, 4-, 6-, and 8-day-old wMel-infected *D. melanogaster* males. (C) Hatch rate  
 191 displaying CI strength with 0-, 4-, 8-, and 12-day-old wRi-infected *D. simulans* males. Filled and  
 192 unfilled sex symbols represent infected and uninfected flies, respectively. Male age is displayed  
 193 to the right of the corresponding sex symbol. CI crosses are colored red, rescue crosses are  
 194 purple, and uninfected crosses are green. Boxplots represent median and interquartile ranges.  
 195 Letters to the right represent statistically significant differences based on  $\alpha=0.05$  calculated by  
 196 Kruskal-Wallis and Dunn's test for multiple comparisons between all groups—crosses that do  
 197 not share a letter are significantly different. *P*-values are reported in **Table S1**. These data  
 198 demonstrate that CI strength decreases with age in two *Wolbachia*-host associations, and more  
 199 slowly in wRi-infected *D. simulans*.

200

201 **What causes CI strength to vary with age?**

202 The bacterial density and CI gene expression hypotheses are both proposed to explain

203 CI-strength variation. These hypotheses predict that *Wolbachia* density and/or *cif* expression

204 positively covary with CI strength. To elucidate the causes of declining CI strength with male  
205 age, we test both hypotheses in the context of rapidly declining wMel CI strength and more  
206 slowly declining wRi CI strength in *D. melanogaster* and *D. simulans*, respectively.

207

208 *Bacterial density differentially covaries with age between species.*

209 We tested the bacterial density hypothesis by dissecting testes from siblings of flies used  
210 in our CI assays above, extracting DNA, and measuring the relative abundance of a single-copy  
211 *Wolbachia* gene (*FtsZ*) relative to a single-copy ultraconserved element (UCE) [75] of  
212 *Drosophila* via qPCR. We selected a random infected sample from the youngest 0-day-old age  
213 group as the reference for all fold change analyses within each experiment. Surprisingly, 0-day-  
214 old *D. melanogaster* testes have low wMel density (**Fig. 3A**; 95% interval = 0.53 - 1.01), and  
215 older 2- (95% interval = 0.92 - 1.11), 4- (95% interval = 0.96 - 1.72), 6- (95% interval = 1.17 -  
216 1.49), and 8-day-old (95% interval = 1.19 - 1.51) infected testes have progressively higher wMel  
217 densities (**Fig. 3A**). wMel densities are significantly different among age groups according to a  
218 Kruskal-Wallis test (**Fig. 3A**;  $P = 1.1E-03$ ). To test for a correlation between wMel densities and  
219 CI strength, we performed Pearson ( $r_p$ ) and Spearman ( $r_s$ ) correlations on the relationship  
220 between wMel fold change against median hatch rates from the associated age groups. Indeed,  
221 wMel densities are significantly positively correlated with decreasing CI strength (**Table S3**;  $r_p =$   
222 0.75,  $P = 5.5E-06$ ;  $r_s = 0.77$ ,  $P = 2.3E-06$ ). wMel densities also covary with age (**Fig. S1**;  $P =$   
223 0.02) and correlate with decreasing CI strength (**Table S3**;  $r_p = 0.64$ ,  $P = 7.7E-04$ ;  $r_s = 0.64$ ,  $P =$   
224 7.4E-04) in the younger 0-, 1-, 2-, and 3-day-old *D. melanogaster* age group.

225 Next, we tested the bacterial density model in wRi-infected *D. simulans*. In contrast to  
226 wMel, wRi-infected 0-day-old (95% interval = 0.82 - 1.36) *D. simulans* testes have the highest  
227 wRi densities that consistently decrease in 4- (95% interval = 0.41 - 0.83), 8- (95% interval 0.41  
228 - 0.83), and 12-day-old (95% interval = 0.24 - 0.40) testes (**Fig. 3B**). wRi densities are  
229 significantly different among *D. simulans* age groups ( $P = 3.9E-04$ ) and are significantly

230 negatively correlated with decreasing CI strength (**Table S3**;  $r_p = -0.84$ ,  $P = 2.4E-07$ ;  $r_s = -0.89$ ,  
231  $P = 6.9E-09$ ).

232 In conclusion, these data fail to support the bacterial density hypothesis for age-  
233 dependent CI-strength variation in *wMel*-infected *D. melanogaster* but support the hypothesis in  
234 *wRi*-infected *D. simulans*. Thus, testes-wide *Wolbachia* densities alone cannot explain age-  
235 dependent CI across *Wolbachia*-host associations, suggesting that other factors must contribute  
236 to these patterns. Next, we investigate if *cif* expression covaries with age-dependent CI.  
237

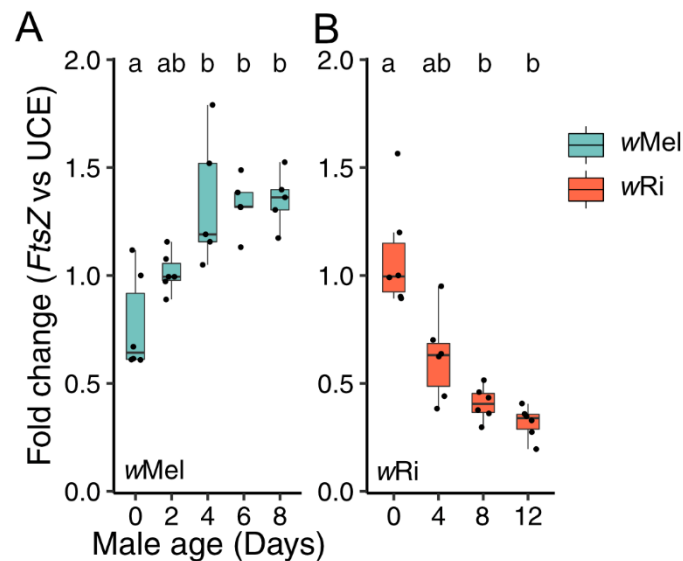

238

239 **Figure 3. Testing the bacterial density model for CI-strength variation.** Fold change across  
240 male age for the relative expression of (A) *wMel* *FtsZ* to *D. melanogaster* UCE and (B) *wRi* *FtsZ*  
241 to *D. simulans* UCE. Letters above data represent statistically significant differences based on  
242  $\alpha=0.05$  calculated by Kruskal-Wallis and Dunn's test for multiple comparisons between all  
243 groups—crosses that do not share a letter are significantly different. Fold change was  
244 calculated as  $2^{-\Delta\Delta cq}$ . *P*-values are reported in **Table S1**. These data demonstrate that *Wolbachia*  
245 density differentially covaries with age between *Wolbachia*-host associations.

246

247 *cif* expression varies with age, but the direction differs between strains.

248 *cif* expression is the proximal mechanistic force hypothesized to control CI-strength

249 variation within *Wolbachia*-host associations [2,53]. *cif* loci are classified into five different

250 phylogenetic clades called 'Types' [53,76–78]. *wMel* has a single pair of Type I *cifs*, and *wRi*  
251 has two identical pairs closely related to the *wMel* copy plus a divergent Type 2 pair [53]. Since  
252 *wMel* density increases as CI strength decreases, we predicted that *cif<sub>wMel[T1]</sub>* expression would  
253 decrease in age relative to the host. Since *wMel* densities increase with male age, *wMel* would  
254 need to express *cif<sub>wMel[T1]</sub>* at lower levels in older males. Contrary to our first prediction, the  
255 relative expression of *cifA<sub>wMel[T1]</sub>* to *D. melanogaster*  $\beta$  Spectrin ( *$\beta$ spec*), a *Drosophila* membrane  
256 protein with invariable expression with age (see Materials and Methods for details), is low in 0-  
257 day-old infected males (95% = 1.1 - 1.6) and consistently increases in 2- (95% interval = 1.5 -  
258 3.2), 4- (95% interval = 1.9 - 2.3), 6- (95% interval = 2.1 - 2.8), and 8-day-old (95% interval = 0.9  
259 - 3.8) testes (**Fig. 4A**). Relative expression of *cifA<sub>wMel[T1]</sub>* to  *$\beta$ spec* significantly varies across  
260 male age ( $P = 8.4E-03$ ) and is significantly positively correlated with decreasing CI strength  
261 (**Table S3**;  $r_p = 0.61$ ,  $P = 6.4E-04$ ;  $r_s = 0.59$ ,  $P = 9.7E-04$ ). Comparably, relative expression of  
262 *cifB<sub>wMel[T1]</sub>* to  *$\beta$ spec* also significantly increases with male age (**Fig. S2A**;  $P = 7.3E-03$ ).  
263 Moreover, analysis of raw quantification cycle ( $C_q$ ) variation with age supports increased  
264 *cifA<sub>wMel[T1]</sub>* (**Fig. S2C**;  $P = 3.1E-04$ ) and *cifB<sub>wMel[T1]</sub>* (**Fig. S2D**;  $P = 1.1E-03$ ) expression;  *$\beta$ spec*  $C_q$   
265 does not vary with age (**Fig. S2E**;  $P = 0.1$ ) and *FtsZ*  $C_q$  significantly decreases with age (**Fig.**  
266 **S2F**;  $P = 1.3E-04$ ). Thus, we report for the first time that testes-wide *cif* expression is not  
267 sufficient to explain CI-strength variation, leading us to reject the hypothesis that testes-wide  
268 *cif<sub>wMel[T1]</sub>* expression can explain age-dependent *wMel* CI strength.

269 However, relative expression of *cifA<sub>wMel[T1]</sub>* to *wMel FtsZ* is highest in 0-day-old infected-  
270 *D. melanogaster* testes (95% interval = 0.9 - 1.1), and consistently decreases in 2- (95% interval  
271 = 0.7 - 0.8), 4- (95% interval = 0.7 - 0.9), 6- (95% interval = 0.6 - 0.7), and 8-day-old (95%  
272 interval = 0.4 - 0.9) testes (**Fig. 4B**). Relative expression of *cifA<sub>wMel[T1]</sub>* to *wMel FtsZ* significantly  
273 varies with age ( $P = 2.9E-03$ ) and is significantly correlated with decreasing CI strength (**Table**  
274 **S3**;  $r_p = -0.8$ ,  $P = 4.0E-07$ ;  $r_s = -0.7$ ,  $P = 3.5E-05$ ). Similarly, relative expression of *cifB<sub>wMel[T1]</sub>* to  
275 *wMel FtsZ* does not significantly covary with age (**Fig. S2B**;  $P = 0.3$ ), but is significantly

276 correlated with decreasing CI strength (**Table S3**;  $r_p = -0.42$ ,  $P = 3.7E-02$ ;  $r_s = -0.46$ ,  $P = 2.2E-$   
277 02). These data are in line with prior reports that wMel expression of  $cifA_{wMel[T1]}$  and  $cifB_{wMel[T1]}$   
278 decrease as males age [53].

279 We also tested if the relative expression of  $cifA_{wMel[T1]}$  to  $cifB_{wMel[T1]}$  varied with age.  
280 Intriguingly,  $cifA/B_{wMel[T1]}$  relative expression does not significantly covary with age (**Fig. 4C**;  $P =$   
281 0.09), but is positively correlated with decreasing CI strength (**Table S3**;  $r_p = -0.61$ ,  $P = 1.3E-03$ ;  
282  $r_s = -0.46$ ,  $P = 0.021$ ). In summary, these data suggest that  $cif_{wMel[T1]}$  expression per wMel  
283 decreases as males age, that  $cifA_{wMel[T1]}$  expression decreases marginally faster than  $cifB_{wMel[T1]}$ ,  
284 and that overall  $cif_{wMel[T1]}$  expression increases relative to the host as males age and CI strength  
285 decreases. This is the first report that CI strength is decoupled from *Wolbachia* densities and  $cif$   
286 expression in testes.

287 Next, we investigated the  $cif$  expression hypothesis in wRi. We predicted that  $cif_{wRi[T1]}$   
288 and/or  $cif_{wRi[T2]}$  expression would decrease relative to host expression. Since wRi density  
289 decreases with age,  $cif$  expression per wRi would not need to change to accomplish this shift in  
290 relative expression. As predicted, relative expression of  $cifA_{wRi[T1]}$  to *D. simulans*  $\beta spec$  is  
291 highest in infected 0-day-old (95% interval = 0.7 - 1.7) testes, and declines in 4- (95% interval =  
292 0.1 - 0.4), 8- (95% interval = 0.3 - 0.7), and 12-day-old (95% interval = 0.2 - 0.3) testes (**Fig.**  
293 **4D**). Relative expression of  $cifA_{wRi[T1]}$  to *D. simulans*  $\beta spec$  significantly covaries with age ( $P =$   
294 1.2E-03) and is significantly correlated with decreasing CI strength (**Table S3**;  $r_p = -0.76$ ;  $r_s = -$   
295 0.88). Similarly, relative expression of  $cifB_{wRi[T1]}$  (**Fig. S3A**;  $P = 2.3E-03$ ),  $cifA_{wRi[T2]}$  (**Fig. S3C**;  $P =$   
296 1.9E-03), and  $cifB_{wRi[T2]}$  (**Fig. S3E**;  $P = 1.2E-03$ ) to *D. simulans*  $\beta spec$  also decreases with age  
297 and each are significantly correlated with decreasing CI strength (**Table S3**). As with wMel-  
298 infected *D. melanogaster* testes, relative expression of  $cifA_{wRi[T1]}$  to wRi *FtsZ* significantly  
299 covaries with male age (**Fig. 4E**;  $P = 4.1E-02$ ) and is significantly correlated with decreasing CI  
300 strength (**Table S3**;  $r_p = -0.47$ ,  $P = 0.032$ ;  $r_s = -0.47$ ,  $P = 0.033$ ). However, 0- (95% interval = 0.9  
301 - 1.2), 4- (95% interval = 0.9 - 1.2), and 8-day-old (95% interval = 0.8 - 1.2) testes have similar

302 expression patterns, suggesting that expression in 12-day-old (95% interval = 0.5 - 0.9) testes  
303 drives this significant difference; however, a Dunn's test was unable to identify significantly  
304 different pairs (**Fig. 4E**). Conversely, *cifB<sub>wRi[T1]</sub>* (**Fig. S3B**;  $P = 0.6$ ), *cifA<sub>wRi[T2]</sub>* (**Fig. S3D**;  $P = 0.2$ ),  
305 and *cifB<sub>wRi[T2]</sub>* (**Fig. S3F**;  $P = 0.2$ ) expression relative to *wRi FtsZ* did not vary with age or  
306 decreasing CI strength (**Table S3**).

307 Finally, as with *wMel*, we investigated the relationship between *cifA* and *cifB* expression  
308 in *wRi* across age and found similar results where *cifA<sub>wRi[T1]</sub>* expression relative to *cifB<sub>wRi[T1]</sub>*  
309 expression does not significantly vary with male age (**Fig. 4F**;  $P = 0.2$ ) but does significantly  
310 correlate with decreasing CI strength (**Table S3**;  $r_p = -0.44$ ,  $P = 0.045$ ;  $r_s = -0.46$ ,  $P = 0.035$ ).  
311 Relative expression of *cifA<sub>wRi[T1]</sub>* to *cifA<sub>wRi[T2]</sub>* expression does not covary with age (**Fig. S3G**;  $P =$   
312  $0.6$ ) or decreasing CI strength (**Table S3**;  $r_p = 0.01$ ,  $P = 0.96$ ;  $r_s = -0.05$ ,  $P = 0.84$ ). Analysis of  
313 raw  $C_q$  values supports decreasing *cifA<sub>wRi[T1]</sub>* (**Fig. S3H**;  $P = 1.0E-03$ ), *cifB<sub>wRi[T1]</sub>* (**Fig. S3I**;  $P =$   
314  $8.1E-04$ ), *cifA<sub>wRi[T2]</sub>* (**Fig. S3J**;  $P = 1.8E-03$ ), and *cifB<sub>wRi[T2]</sub>* (**Fig. S3K**;  $P = 1.7E-03$ ) expression  
315 with male age; *D. simulans βspec C<sub>q</sub>* does not vary with age (**Fig. S3L**;  $P = 0.6$ ) and *wRi FtsZ*  
316  $C_q$  significantly increases with age (**Fig. S3M**;  $P = 8.9E-04$ ). In summary, *cif<sub>wRi</sub>* expression  
317 significantly decreases with age in *wRi* testes, *cifA<sub>wRi[T1]</sub>* expression decreases marginally faster  
318 than *cifB<sub>wRi[T1]</sub>* expression, and there is a small decrease in *cifA<sub>wRi[T1]</sub>* expression relative to *wRi*  
319 but other *cif<sub>wRi</sub>* loci do not follow similar trends.

320 In conclusion, we find that *wMel cif* expression does not explain age-dependent CI-  
321 strength variation. More specifically, *wMel*'s expression of *cif* genes decreases with age [53],  
322 relative *wMel* and *wRi cifA*-to-*cifB* expression varies marginally with age, and *cif* expression  
323 dynamics vary considerably across male age and differ between *wMel*- and *wRi*-infected hosts.

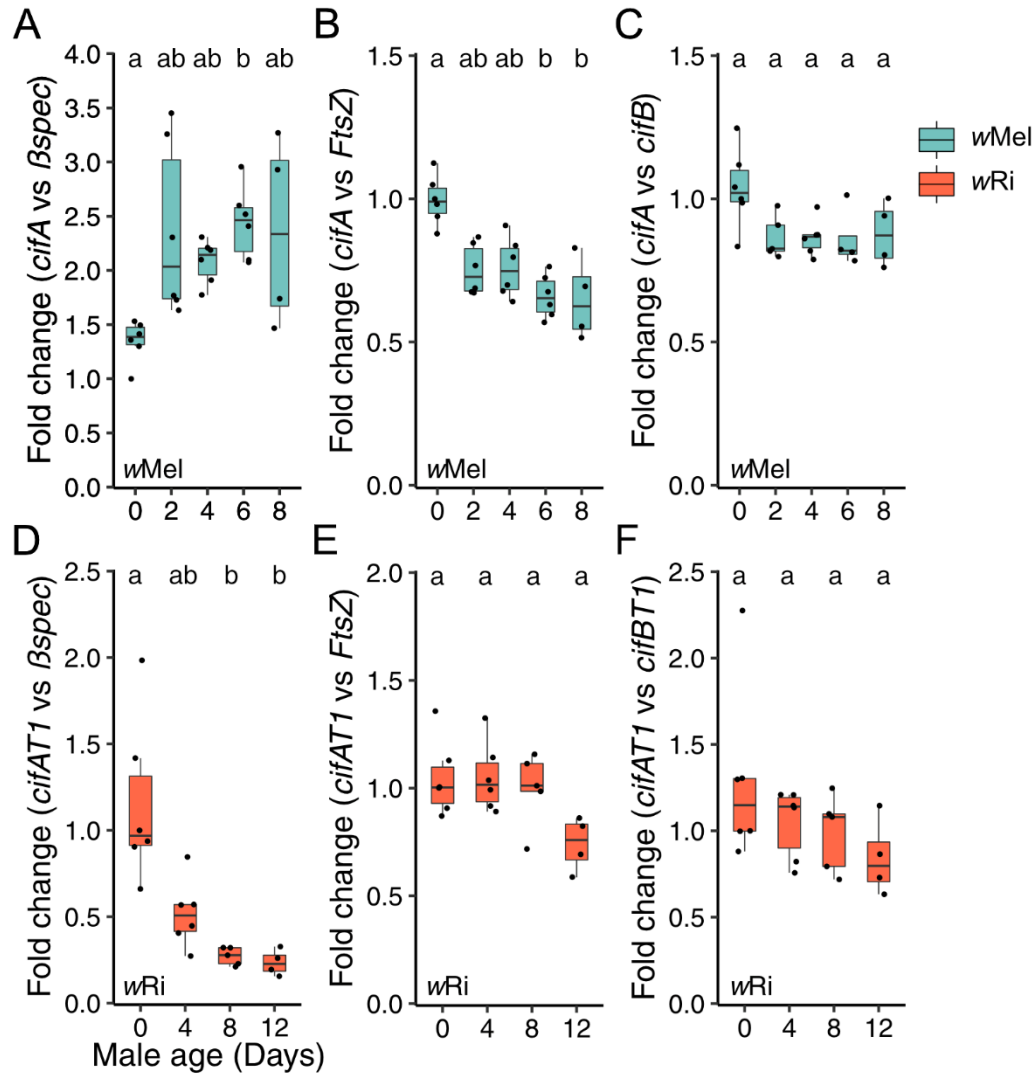

324

325 **Figure 4. Testing the *cif* expression hypothesis for CI-strength variation.** Fold change  
 326 across male age for the relative expression of (A) *cifA*<sub>wMel[T1]</sub> to *D. melanogaster*  $\beta$ *spec*, (B)  
 327 *cifA*<sub>wMel[T1]</sub> to wMel *FtsZ*, (C) *cifA*<sub>wMel[T1]</sub> to *cifB*<sub>wMel[T1]</sub>, (D) *cifA*<sub>wRi[T1]</sub> to *D. simulans*  $\beta$ *spec*, (E)  
 328 *cifA*<sub>wRi[T1]</sub> to wRi *FtsZ*, and (F) *cifA*<sub>wRi[T1]</sub> to *cifB*<sub>wRi[T1]</sub>. Letters above data represent statistically  
 329 significant differences based on  $\alpha=0.05$  calculated by Kruskal-Wallis and Dunn's test for multiple  
 330 comparisons between all groups—crosses that do not share a letter are significantly different.  
 331 Fold change was calculated as  $2^{-\Delta\Delta Cq}$ . *P*-values are reported in **Table S1**. These data  
 332 demonstrate that age-dependent *cif* expression is variably related to host expression, that  
 333 *cif*<sub>wMel[T1]</sub> expression decreases per *Wolbachia* with age, and that *cifA/B* relative expression only  
 334 marginally decreases with age in both systems.

335

336 **What causes *Wolbachia* density to vary with age?**



337 We find that testes-wide *Wolbachia* density significantly increases with male age in  
338 *wMel*-infected *D. melanogaster* and significantly decreases with male age in *wRi*-infected *D.*  
339 *simulans*. The causes of age-dependent *Wolbachia* density variation have not been explored.  
340 We test three plausible hypotheses. Namely, that phage lytic activity, Octomom copy number, or  
341 host immune expression may govern age-dependent *Wolbachia* densities.

342  
343 *Phage density does not covary with age-dependent Wolbachia density.*

344 The phage density model predicts that *Wolbachia* density negatively covaries with phage  
345 lytic activity [46]. Since phage lysis corresponds with increased phage copy number [46,59], we  
346 tested the phage density model by measuring the relative abundance of phage to *Wolbachia*  
347 *FtsZ* using qPCR. *wMel* and *wRi* each harbor a unique set of phage haplotypes: *wMel* has two  
348 phages (WOMelA and WOMelB), and *wRi* has four (WORiA-C, WORiB is duplicated) [79]. We  
349 monitored WOMelA and WOMelB of *wMel* simultaneously using primers that target homologs  
350 present in a single copy in each phage. Conversely, we monitored WORiA, WORiB, and  
351 WORiC separately since shared homologs are too diverged to make suitable qPCR primers that  
352 match multiple phage haplotypes.

353 First, we evaluate the phage density model for *wMel*. We predicted the relative  
354 abundance of WOMelA/B to decrease with *D. melanogaster* male age since *wMel* density  
355 increases with age. However, there is no change in WOMelA/B abundance relative to *wMel*  
356 *FtsZ* as males age (**Fig. 5A**;  $P = 0.3$ ), while WOMelA/B abundance relative to *D. melanogaster*  
357 UCE increases similar to *wMel* density (**Fig. S4A**;  $P = 3.0E-04$ ). Relative phage abundance is  
358 not significantly correlated with decreasing *wMel* CI strength (**Table S3**;  $r_p = -0.065$ ,  $P = 0.75$ ;  $r_s$   
359  $= 0.17$ ,  $P = 0.39$ ). Similarly, WOMelA/B significantly varies with age relative to UCE (**Fig. S4B**;  $P$   
360  $= 0.049$ ) but not *wMel FtsZ* (**Fig. S4C**;  $P = 0.15$ ) in the 0-, 1-, 2-, and 3-day-old age experiment.

361 Next, we predicted that WORi phage abundance would increase with decreasing *wRi*  
362 densities across *D. simulans* male age if governed by the phage density model. As with *wMel* in



363 *D. melanogaster*, relative WORiB to wRi *FtsZ* abundance does not significantly covary with  
364 male age (**Fig. 5B**;  $P = 0.053$ ) or correlate with decreasing CI strength (**Table S3**;  $r_p = 0.032$ ,  $P$   
365  $= 0.88$ ;  $r_s = 0.12$ ,  $P = 0.58$ ). Relative WORiB to *D. simulans* UCE abundance increases with  
366 age, similar to wRi density (**Fig. S4D**;  $P = 4.4E-04$ ). Comparably, WORiA (**Fig. S4E**;  $P = 0.3$ )  
367 and WORiC (**Fig. S4F**;  $P = 0.4$ ) abundance relative to wRi did not vary with male age. These  
368 data suggest that phage WO is unrelated to age-dependent *Wolbachia* density variation in wMel  
369 and wRi.

370

371 *Octomom* does not vary with age-dependent wMel density.

372 The relative abundance of *Octomom* to *Wolbachia* genes positively covaries with wMel  
373 density [64,80]. We tested if *Octomom* copy number variation correlates with age-dependent  
374 wMel density variation using qPCR. Only wMel encodes all eight *Octomom* genes, and  
375 *Octomom* amplification is rapid and unstable, commonly changing between generations. We  
376 found that the relative abundance of an *Octomom* gene (WD0509) to wMel *FtsZ* does not  
377 covary with male age (**Fig. 5C**;  $P = 0.53$ ) or correlate with decreasing CI strength in the older  
378 age group (**Table S3**;  $r_s = -0.19$ ,  $P = 0.36$ ;  $r_s = 0.1$ ,  $P = 0.61$ ). Similar results were observed in 0-  
379 , 1-, 2-, and 3-day-old wMel-infected males (**Fig. S5**; **Table S3**). We conclude that *Octomom*  
380 copy number is unrelated to the age-dependent increase in wMel densities.

381

382 *Relish* expression is positively correlated with age-dependent wMel, but not wRi, densities.

383 Theory predicts that natural selection favors the evolution of host genes that suppress CI  
384 [6]. Manipulation of *Wolbachia* densities is one mechanism that may drive CI suppression [2].  
385 Since the immune system is designed to control bacterial loads, we investigated the role of the  
386 host immune system in *Wolbachia* density variation across male age. The immune deficiency  
387 (*Imd*) pathway is broadly involved in defense against gram-negative bacteria like *Wolbachia*  
388 [81]. Bacteria activate the *Imd* pathway by interacting with peptidoglycan recognition proteins

389 which start a signal cascade that results in the expression of the NF- $\kappa$ B transcription factor  
390 Relish (*Rel*). Relish then activates antimicrobial peptide production.

391 We predicted that *D. melanogaster* Relish expression and *wMel* density would be  
392 correlated if the Imd pathway is involved in *wMel* density regulation. Indeed, relative expression  
393 of Relish to  $\beta$ *spec* is lowest in 0-day-old (95% interval = 0.9 - 1.1) infected testes and  
394 consistently increases in 2- (95% interval = 1.1 - 1.8), 4- (95% interval = 1.3 - 1.7), 6- (95%  
395 interval = 1.9 - 2.3), and 8-day-old (95% interval = 1.5 - 3.9) testes (**Fig. 5D**). Relative  
396 expression of Relish to  $\beta$ *spec* significantly varies among age groups ( $P = 6.1E-4$ ) and is  
397 significantly positively correlated with *wMel FtsZ* to  $\beta$ *spec* within testes samples (**Fig. 5E**;  $r_p =$   
398 0.77,  $P = 2.5E-06$ ;  $r_s = 0.87$ ,  $P = 1.4E-06$ ).

399 Conversely, relative expression of *D. simulans* Relish to  $\beta$ *spec* does not significantly  
400 covary with age (**Fig. 5F**;  $P = 0.7$ ), but remains positively correlated with the relative expression  
401 of *wRi FtsZ* to  $\beta$ *spec* within testes samples according to Pearson, but not Spearman, analyses  
402 (**Fig. 5G**;  $r_p = 0.55$ ,  $P = 0.012$ ;  $r_s = 0.13$ ,  $P = 0.59$ ). In summary, Relish expression is positively  
403 correlated with age-dependent *wMel* densities in *D. melanogaster*, but less so in *wRi*-infected *D.*  
404 *simulans*, supporting a role for the Imd pathway in the regulation of at least *wMel* density  
405 variation. Importantly, since *wMel* and *wRi* density are differentially associated with immune  
406 expression, Imd activity may represent a novel mechanism separating the age-dependent  
407 density dynamics in these systems. These data highlight that age-dependent *Wolbachia* density  
408 variation may have multiple mechanistic underpinnings.

409

410

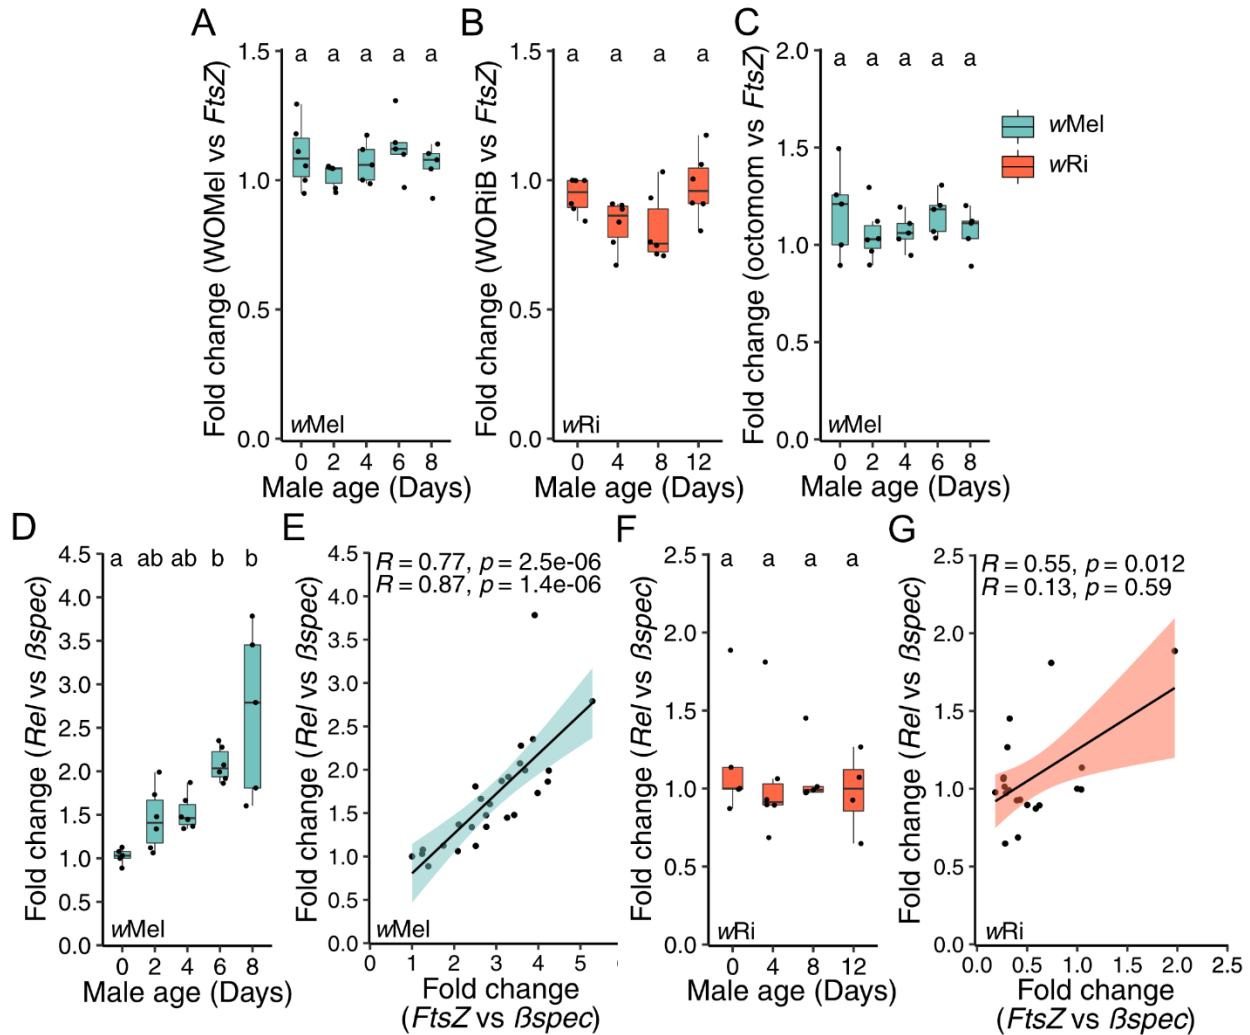

411

412 **Figure 5. Testing the phage density, Octomom, and host immunity hypotheses for age-**  
 413 **dependent *Wolbachia* density variation.** Fold change across male age for the relative  
 414 abundance or expression of (A) WOMelA/B to wMel *FtsZ*, (B) WORiB to wRi *FtsZ*, (C)  
 415 Octomom gene WD0509 to wMel *FtsZ*, (D) *D. melanogaster Rel* to *Bspec*, and (F) *D. simulans*  
 416 *Rel* to *Bspec*. Correlation between the relative expression of *Rel* to *Bspec* and *FtsZ* to *Bspec*  
 417 (E) wMel and (F) wRi. Letters above data represent statistically significant differences based on  
 418  $\alpha=0.05$  calculated by Kruskal-Wallis and Dunn's test for multiple comparisons between all  
 419 groups—crosses that do not share a letter are significantly different. (E, G) Pearson (top) and  
 420 Spearman (bottom) correlations are reported. Fold change was calculated as  $2^{-\Delta\Delta Cq}$ . P-values  
 421 are reported in Table S1. These data demonstrate that age-dependent *Wolbachia* densities are  
 422 not controlled by phage WO lysis or Octomom copy number, but are correlated with *Rel*  
 423 expression in *D. melanogaster* and less so in *D. simulans*.

424

## 425 Discussion

426           Within *Wolbachia*-host systems, several factors influence CI strength  
427 [25,26,33,34,46,59,70–73], but male age can be particularly impactful [3,16,23,25]. Our results  
428 elucidate how fast and why CI strength declines as males age. First, we estimate that CI-  
429 strength decreases rapidly for *wMel*-infected *D. melanogaster* (19%/ day), becoming statistically  
430 insignificant when males reach three days old. In contrast, *wRi* causes intense CI that declines  
431 more slowly (6%/ day), resulting in statistically significant CI through at least the first 12 days of  
432 *D. simulans* male life. Second, testes-wide *Wolbachia* densities and *cif* expression increase in  
433 *wMel*-infected *D. melanogaster* and decrease in *wRi*-infected *D. simulans* as males age and CI  
434 weakens, indicating that testes-wide bacterial density and CI gene expression cannot fully  
435 account for age-dependent CI strength across host-*Wolbachia* associations. Third, while WO  
436 phage activity and Octomom copy number cannot explain *Wolbachia* density variation, *D.*  
437 *melanogaster* immune expression covaries with *wMel* densities, suggesting the host immune  
438 system may contribute to age-dependent *Wolbachia* density in *D. melanogaster*, but much less  
439 so in *D. simulans*. We discuss how our discoveries inform the basis of age-dependent CI-  
440 strength variation, how multiple mechanistic underpinnings likely govern age-dependent  
441 *Wolbachia* densities, and how age-dependent CI may contribute to *Wolbachia* frequency  
442 variation observed in nature.

443

### 444 ***Testes-wide Wolbachia density and CI gene expression do not fully explain age-*** 445 ***dependent CI-strength variation.***

446           Since CI strength decreases with age for both *wMel*-infected *D. melanogaster* and *wRi*-  
447 infected *D. simulans*, we predicted that *Wolbachia* densities and *cif* expression would also  
448 decrease with age. Indeed, *wRi* densities and *cif* expression are highest in young males and  
449 decrease significantly with age, supporting both the bacterial density and *cif* expression  
450 hypotheses for *wRi*. However, the opposite is true for *wMel*—both *wMel* densities and *cif*

451 expression increase with male age as CI strength decreases, indicating that testes-wide  
452 *Wolbachia* density and *cif* expression are insufficient to explain age-dependent CI-strength  
453 variation in *wMel*-infected *D. melanogaster*. Despite support that CI strength is linked to  
454 *Wolbachia* density and *cif* expression across and within systems [33,34,44–47,53,59], these  
455 observations add to a growing body of literature suggesting *Wolbachia* densities in adult testes  
456 [26,72] and, for the first time, *cif* expression, are insufficient to explain CI-strength variation  
457 broadly. We discuss three hypotheses to explain the disconnect between testes-wide *Wolbachia*  
458 density, *cif* expression, and CI strength with male age.

459 First, the localization and density of *Wolbachia* and *cif* products within specific cells in  
460 testes may more accurately predict CI strength. Indeed, the proportion of infected spermatocyte  
461 cysts covaries with CI strength in natural and transinfected combinations of CI-inducing  
462 *Wolbachia* and *D. melanogaster*, *D. simulans*, *D. yakuba*, *D. teissieri*, and *D. santomea* [44,45].  
463 Intriguingly, two *wRi*-infected *D. simulans* strains whose *Wolbachia* cause variable CI did not  
464 have different *Wolbachia* densities according to qPCR, but the number of infected sperm cysts  
465 covaries with CI between strains [82]. Thus, testes-wide *Wolbachia* densities may not reflect the  
466 cyst infection frequency, but it is unknown how generalizable this discrepancy is across or within  
467 *Wolbachia*-host associations with variable CI strengths. It seems plausible that while *wMel*  
468 densities increase in the testes as males age, the proportion of infected spermatocytes could  
469 decrease. Notably, since *wMel* infections increase drastically as males age, a considerable shift  
470 in localization and density dynamics would be necessary. Microscopy assays are required for  
471 future work to test if *Wolbachia* and *cif* localization explains *wMel* age-dependent CI-strength  
472 variation.

473 Second, age-dependent CI may be governed by developmental constraints of CI-  
474 susceptibility. For instance, the paternal grandmother age effect, where sons of older virgin  
475 females cause stronger CI than sons of younger females, covaries with *Wolbachia* densities in  
476 embryos but not in adult males [26]. Intriguingly, temperature-sensitive CI-strength variation in

477 *Cardinium*-infected *Encarsia* wasps is also decoupled from symbiont densities, but CI strongly  
478 correlates with pupal development time [83,84]. *Cardinium* CI effectors likely have more time to  
479 interact with host targets at critical stages of pupal development when slowed by cool  
480 temperatures, despite lower *Cardinium* density [83,84]. These studies suggest that sperm are  
481 modified in spermatogenesis before adult eclosion, and that variation in symbiont densities  
482 during early development can contribute to CI-strength variation. If modified sperm are primarily  
483 produced during pupal or larval development, then younger adult males would have a higher  
484 proportion of CI-modified sperm than older males in their seminal vesicle since older males  
485 continue to produce sperm as adults. Since CI strength decreases faster in *D. melanogaster*  
486 than in *D. simulans*, this hypothesis predicts that adult *D. simulans* sperm production is slower  
487 and/or that CI modification occurs for an extended time. Functional work is necessary to  
488 determine if CI modification is developmentally restricted.

489 Finally, age-dependent CI may be related to the availability of CI-effector targets with  
490 male age and not the abundance of *cif* products. Indeed, the number of genes transcribed by *D.*  
491 *melanogaster* increases from 7,000 in embryos to over 12,000 in adult males, and nearly a third  
492 of genes are not expressed until 3<sup>rd</sup> instar [85]. As adult males age, the number of transcribed  
493 genes continues to vary, though less so than during metamorphosis [85]. These data support  
494 the possibility that host targets of CI may vary in abundance as males age. However, since  
495 transgenic *cif* expression can significantly enhance CI strength above wild-type levels [53], there  
496 are circumstances when natural *cif* expression is not high enough to saturate all targets—it is  
497 unknown if similar experimental approaches can strengthen age-dependent CI. More work will  
498 be necessary to determine the host genes that modify CI and how those factors vary in  
499 expression relative to CI strength.

500

501 ***Age-dependent bacterial density covaries with immune expression, not phage or***

502 ***Octomom.***

503 We report a strong relationship between male age and *Wolbachia* densities that differ  
504 between systems: densities decrease in *w*Ri-infected *D. simulans* and increase in *w*Mel-infected  
505 *D. melanogaster*. These findings add to a growing body of literature reporting age-dependent  
506 variation in *Wolbachia* densities across age in different tissues and sexes [44,86], but the basis  
507 of this variation remains unexplored. We investigated the cause(s) of this variation for the first  
508 time. First, we tested whether phage or Octomom covary with *Wolbachia* densities. Despite  
509 prior reports that phage WO of *Nasonia* and *Habrobracon* *Wolbachia* can regulate temperature-  
510 dependent *Wolbachia* densities [46,59] and that Octomom copy number correlates with *w*Mel  
511 densities [64,80], we found that neither covaries with age-dependent *Wolbachia* densities in  
512 testes.

513 We next asked whether host genes regulate age-dependent *Wolbachia* densities.  
514 *Wolbachia* are gram-negative bacteria and encode the genes necessary to synthesize  
515 peptidoglycan, which can activate the host Imd pathway to produce antimicrobial peptides  
516 (AMPs) for immune defense [87,88]. Thus, host immune genes were attractive candidates for  
517 the regulation of *Wolbachia* densities. Here, we report that Relish expression, which activates  
518 AMP production in the Imd pathway [81], increases with *D. melanogaster* male age and strongly  
519 correlates with increased *w*Mel densities. Conversely, Relish does not vary with *D. simulans*  
520 male age and is only very weakly correlated with *w*Ri densities. Relish expression is the only  
521 factor we investigated that differentiates the density dynamics of these strains and is an exciting  
522 candidate gene for host manipulation of *Wolbachia* density dynamics. To our knowledge, this is  
523 the first report that host immunity covaries with *Wolbachia* density. We propose two non-  
524 exclusive hypotheses to explain the relationship between *w*Mel densities and Relish expression.

525 First, *w*Mel rapidly proliferates as males age and elicit an immune response proportional  
526 to their infection density. Since established *Wolbachia* are bound in host-derived membranes  
527 [89], *w*Mel may largely evade the host immune response [11]. Indeed, AMP gene expression  
528 only covaries with infection state in transinfected [90–93], and not established infections [94–



529 97], suggesting that *Wolbachia* can be targeted by Imd but adapt to avoid its effects. Thus, the  
530 *Drosophila* immune system may be attempting, but unable, to control age-dependent *Wolbachia*  
531 densities. This hypothesis does not explain differences between *wMel* and *wRi* densities since it  
532 assumes age-dependent *wMel* densities increase independent of Imd expression. Thus, an  
533 alternative mechanism unrelated to immune expression may contribute to variation in age-  
534 dependent *Wolbachia* densities across species.

535         Second, Imd expression increases independent of *Wolbachia* infection but impacts  
536 *Wolbachia* densities. Indeed, aging in *D. melanogaster* is associated with increased expression  
537 of AMPs, Relish, and other immune genes [98–104], and age covaries with increased gut  
538 microbial loads [98–100,105–107]. Why gut bacterial loads increase with *D. melanogaster* age  
539 remains unknown; but age-dependent immune expression may damage the epithelium, lead to  
540 dysbiosis through differential effects on gut microbial members, alter gut tissue renewal and  
541 differentiation, and/or cause cellular inflammation [81,108]. To our knowledge, we report the first  
542 case where endosymbiont densities increase with age-dependent immune expression,  
543 suggesting that the cause(s) of age-dependent bacterial proliferation apply to more than gut  
544 microbes. Such age-dependent immune expression may be host restricted since Relish  
545 expression was essentially invariable with age in *D. simulans* males and only weakly correlated  
546 with *wRi* densities. Functional and cell biological assays are needed to reinforce the relationship  
547 between host immunity, other novel host factors, and age-dependent *Wolbachia* densities.  
548 Mapping additional host factors that modulate *Wolbachia* densities will be particularly useful.

549

#### 550 **Age-dependent CI strength could contribute to *Wolbachia* frequency variation in nature.**

551         We can consider our estimates of age-dependent CI strength in the context of an  
552 idealized discrete-generation model of *Wolbachia* frequency dynamics first proposed by  
553 Hoffmann et al. (1990). This model incorporates imperfect maternal transmission ( $\mu$ ), *Wolbachia*  
554 effects on host fitness ( $F$ ), and the proportion of embryos that hatch in a CI cross relative to



555 compatible crosses ( $H$ ) [3]. Across all experiments, CI strength ( $s_h = 1 - H$ ) progressively  
556 decreases as males age (**Table S2**):  $wMel$  CI strength decreases quickly (Day 0  $s_h = 0.860$ ; Day  
557 8  $s_h = -0.007$ ) and  $wRi$  CI strength decreases relatively slowly (Day 0  $s_h = 0.991$ ; Day 8  $s_h =$   
558 0.244). Small negative values of  $s_h$  indicate that the CI cross has a slightly higher egg hatch  
559 than the compatible crosses.

560  $wRi$  occurs globally at high and relatively stable infection frequencies, consistent with  
561 generally strong CI [4,22], while  $wMel$  varies in frequency on several continents. In eastern  
562 Australia,  $wMel$  frequencies range from ~90% in the tropical north to ~30% in the temperate  
563 south [30]. While the factors that maintain this cline are unresolved, mathematical modeling  
564 suggests clinal differences in CI strength likely contribute [30]. For example, CI must be  
565 essentially nonexistent ( $s_h \ll 0.05$ ) to explain relatively low  $wMel$  frequencies observed in  
566 temperate Australia, assuming little imperfect transmission ( $\mu = 0.01 - 0.026$ ) [109]. Conversely,  
567 with  $\mu = 0.026$  and similarly low-to-nonexistent CI ( $s_h \leq 0.055$ ), large and positive  $wMel$  effects  
568 on host fitness ( $F \sim 1.3$ ) are required to explain higher  $wMel$  frequencies observed in the tropics.  
569 Though, explaining higher tropical frequencies becomes easier with stronger CI ( $s_h > 0.05$ ) or  
570 more reliable  $wMel$  maternal transmission ( $\mu < 0.026$ ) (Kriesner et al. 2016).

571 So what is  $wMel$  CI strength in nature? Field-collected males from near the middle of the  
572 Australian cline to the northern tropics cause very weak ( $s_h \sim 0.05$ ) to no CI (Hoffmann et al.  
573 1998). These, and other data from the middle of the cline [25], led Kriesner et al. (2016) to  
574 conjecture that the plausible range of  $s_h$  in subtropical/tropical Australian populations is  $s_h = 0 -$   
575 0.05, but  $< 0.1$ . In our study, only 6- ( $s_h = -0.006$ ) and 8-day-old ( $s_h = -0.007$ )  $wMel$ -infected  
576 males exhibited CI weaker than  $s_h = 0.1$ , suggesting that field-collected males causing little or  
577 no CI [109] are older than 4 days. Though, interactions among male age, temperature,  
578 remating, and other factors likely contribute to weaker CI in younger males  
579 [25,33,34,46,59,70,71]. Future analyses aimed at disentangling the contributions of male age  
580 and other factors to CI-strength variation are sorely needed. These estimates, along with

581 estimates of *Wolbachia* transmission rate variation across genetic and abiotic contexts [18], are  
582 ultimately required to better understand *Wolbachia* frequency variation in host populations  
583 [18,20,30,110,111].

584

### 585 **Conclusions.**

586 Our results highlight that testes-wide *Wolbachia* densities and *cif* expression are  
587 insufficient to explain age-dependent CI strength and that no single mechanism is likely to  
588 explain age-dependent *Wolbachia* densities. While age-dependent CI strength in *wRi* aligns with  
589 the bacterial density and CI gene expression hypotheses without the need to consider other  
590 factors, *wMel* CI strength cannot be explained by either of these hypotheses. We propose that  
591 localization, development, and/or host genetic variation contribute to this relationship. Moreover,  
592 *wMel* densities increase and *wRi* decrease as their respective hosts age. Neither phage *WO* nor  
593 *Octomom* explain age-dependent *Wolbachia* density, but variation in these systems covaries  
594 with the expression of the immune gene *Relish*. This represents the first report that the host  
595 immune system may contribute to variation in *Wolbachia* density in a natural *Wolbachia*-host  
596 association. This work motivates an extensive analysis of *Wolbachia* and *cif* expression in the  
597 context of localization and development, and a thorough investigation of the relationship  
598 between host genes and *Wolbachia* density and CI phenotypes. Finally, Incorporating the age-  
599 dependency of CI into future modeling efforts may help improve our ability to explain temporally  
600 and spatially variable *Wolbachia* infection frequencies, as incorporating temperature effects on  
601 *wMel*-like *Wolbachia* transmission has [18,20,112]. Ultimately this will help explain *Wolbachia*'s  
602 status as the most prevalent endosymbionts in nature.

603

## 604 **Materials and Methods**

### 605 ***Fly lines***

606 All fly lines used in this study are listed in **Table S4**. Uninfected flies were derived via  
607 tetracycline treatment in prior studies [14,53]. Tetracycline cleared lines were used in  
608 experiments over a year after treatment, avoiding the effects of antibiotic treatment on  
609 mitochondria [113]. We regularly confirmed infection status by using PCR to amplify the  
610 *Wolbachia* surface protein (*wsp*). An arthropod-specific 28S rDNA was also amplified and  
611 served as a control for DNA quality [20,74]. DNA was extracted for infection checks using a  
612 squish buffer protocol. Briefly, flies were homogenized in 50 uL squish buffer per fly (100mL 1M  
613 Tris-HCL, 0.0372g EDTA, 0.1461g NaCl, 90 mL H<sub>2</sub>O, 150uL Proteinase K), incubated at 65°C  
614 for 45m, incubated at 94°C for 4m, centrifuged for 2m, and the supernatant was used  
615 immediately for PCR.

616

### 617 ***Fly care and maintenance***

618 Flies were reared in vials with 10mL of food made of cornmeal (32.6%), dry corn syrup  
619 (32%), malt extract (20.6%), inactive yeast (7.8%), soy flour (4.5%), and agar (2.6%). Fly stocks  
620 were maintained at 23°C between experiments. Flies used for virgin collections were reared at  
621 25°C, virgin flies were stored at 25°C, and experiments were performed at 25°C. Flies were  
622 always kept on a 12:12 light:dark cycle. Flies were anesthetized using CO<sub>2</sub> for virgin collections  
623 and dissections. During hatch-rate assays, flies were mouth aspirated between vials.

624

### 625 ***Hatch-rate assays***

626 CI manifests as embryonic death. We measured CI as the percentage of embryos that  
627 hatch into larva. Flies used in hatch rates were derived from vials where flies were given ~24hr  
628 to lay to control for rearing density [72]. In the morning, virgin 6-8 day females were added

629 individually to vials containing a small ice cream spoon filled with fly food. Spoon fly food was  
630 prepared as described above, but with blue food coloring added, 0.1g extra agar per 100mL of  
631 food, and fresh yeast smeared on top. After 4-5hr of acclimation, a single virgin male was added  
632 to each vial. The age of virgin males varied by experiment and cross. Paternal grandmother age  
633 was not controlled, but paternal grandmothers were non-virgin when setting up vials for fathers.  
634 Since *Wolbachia* densities associated with older paternal grandmothers are reduced upon  
635 mating [26], we do not expect variation in paternal grandmother *Wolbachia* densities across  
636 experiments or conditions. Vials with paired flies were incubated overnight at 25°C. Flies were  
637 then aspirated into new vials with a fresh spoon. Vials were incubated for another 24hr before  
638 flies were removed via aspirating. Embryos were counted on spoons immediately after flies  
639 were removed. After 48hr, the number of remaining unhatched eggs were counted. The  
640 percentage of embryos that hatched was calculated.

641

#### 642 **Relative abundance assays**

643 Siblings from hatch-rate assays were collected for DNA extractions. Virgin males were  
644 anesthetized and testes were dissected in chilled phosphate-buffered saline (PBS). Five pairs of  
645 testes were placed into a single 1.5mL Eppendorf tube and stored at -80°C until processing. All  
646 tissue was collected the day after the hatch-rate setup. Tissue was homogenized using a pestle,  
647 and the DNeasy Blood and Tissue kit (Qiagen) was used to extract and purify DNA.

648 qPCR was used to measure the relative abundance of the host, *Wolbachia*, phage WO,  
649 and Octomom products. Samples were tested in triplicate using Powerup SYBR Green Master  
650 Mix (Applied Biosystems), which contains a ROX passive reference dye. Unless otherwise  
651 noted, all primers were designed using Primer3 v2.3.7 in Geneious Prime [114]. Host primers  
652 target an ultraconserved element (UCE) *Mid1* identified previously [75]. Phage genes were also  
653 identified from prior works [79]. Primers for *wMel*'s phages target both WOMelA (WD0288) and  
654 WOMelB (WD0634), while those for *wRi* are unique to a single phage haplotype. WORiA,

655 WORiB, and WORiC were measured with wRi\_012460, wRi\_005590/wRi\_010250, and  
656 wRi\_006880 primers, respectively. Only wMel has all eight Octomom genes (WD0507-WD0514)  
657 [63]. We measured wMel Octomom copy number using primers targeting WD0509. Primer  
658 sequences and PCR conditions are listed in **Table S5**. Fold difference was calculated as  $2^{-\Delta\Delta Ct}$   
659 for each comparison. A random sample in the youngest age group was selected as the  
660 reference.

661

### 662 ***Gene expression assays***

663 Siblings from hatch-rate assays were collected for RNA extractions. Virgin males were  
664 anesthetized, and testes were dissected in chilled RNase-free PBS. Fifteen pairs of testes were  
665 placed into a single 2mL tube with 200 uL of Trizol and four 3 mm glass beads. Tissue was kept  
666 on ice between dissections. Samples were then homogenized using a TissueLyser II (Qiagen)  
667 at 25Hz for 2m, centrifuged, and stored at -80°C until processing. All tissue was collected the  
668 day after the hatch-rate setup.

669 Samples were thawed, 200uL of additional Trizol was added, and tissue was further  
670 homogenized using a TissueLyser II at 25Hz for 2m. RNA was extracted using the Direct-Zol  
671 RNA Miniprep kit (Zymo Research) following the manufacturer's recommendations, but with an  
672 extra wash step. On-column DNase treatment was not performed. The 'rigorous' treatment  
673 protocol from the DNA-free kit (Ambion) was used to degrade DNA in RNA samples. Samples  
674 were confirmed DNA-free using PCR and gel electrophoresis for an arthropod-specific 28S  
675 rDNA [20,74]. The Qubit RNA HS Assay Kit (Invitrogen) was used to measure RNA  
676 concentration. Samples within an experiment were diluted to the same concentration. RNA was  
677 converted to cDNA using SuperScript IV VILO Master Mix (Invitrogen) with either 200ng or  
678 500ng of total RNA per reaction depending on the experiment. qRT-PCR was performed using  
679 1ng of cDNA per reaction using Powerup SYBR Green Master Mix (Applied Biosystems). All  
680 samples were tested in triplicate.

681 Primers for expression included host reference, *Wolbachia* reference, *cif*, and host  
682 immune genes. Primers to *Drosophila* genes for qRT-PCR were selected from FlyPrimerBank  
683 [115]. Since *Drosophila* expression patterns change with age [85], a host gene that is invariable  
684 with male age was selected to act as a reference gene for relative expression analyses. We  
685 selected an invariable gene using the *Drosophila* Gene Expression Tool (DGET) to retrieve  
686 modENCODE gene expression data for ribosome and cytoskeletal genes [116]. DGET reports  
687 expression as Reads Per Kilobase of transcript, per million mapped reads (RPKM), and  
688 included data for adult males 1, 5, and 30 days after eclosion.  $\beta$ -spec (1 Day = 81 RPKM, 5 Day  
689 = 80, 30 Day = 79) was selected because it is largely invariable across age. Our results confirm  
690 invariable expression across male age (**Fig. S2E**; **Fig. S3L**). *D. melanogaster* and *D. simulans*  
691 are identical across  $\beta$ spec primer binding sequences. All other primers were designed using  
692 Primer3 in Geneious Prime [114] and are listed in **Table S5**. Fold difference was calculated as  
693  $2^{-\Delta\Delta C_t}$  for each comparison. A random sample in the youngest age group was selected as the  
694 reference.

695

### 696 **Statistical analyses**

697 All statistics were performed in R [117]. Hatch rate, relative abundance, and expression  
698 assays were analyzed using a Kruskal-Wallis followed by a Dunn's multiple comparisons test.  
699 Kruskal-Wallis and Dunn's *P*-values are reported in **Table S1**. Correlations between hatch rate  
700 and expression or relative abundance measures were performed using Pearson and Spearman  
701 correlations in GGPubR [118]. Correlation statistics are reported in **Table S3**. 95% confidence  
702 intervals were calculated using the classic MeanCI function in DescTools [119]. 95% BCa  
703 intervals were calculated using boot.ci in boot [120]. Samples with fewer than ten embryos laid  
704 were excluded from hatch-rate analyses. Samples with a  $C_q$  standard deviation exceeding 0.4  
705 between triplicate measures were excluded from qPCR and qRT-PCR analyses. Figures were

706 created using GGPlot2 [121], and figure aesthetics were edited in Affinity Designer 1.8 (Serif  
707 Europe, Nottingham, UK).

708

709 ***Data availability***

710 All data are made publicly available in the supplement of this manuscript.

711

712 **Acknowledgments**

713 We thank Michael Turelli for helpful feedback and members of the Cooper Lab for  
714 providing assistance throughout this study: Will Conner for help identifying phage gene targets  
715 for qPCR, Mike Hague for support with BCa estimates of *H*, Kelley Van Vaerenberghe and John  
716 Statz for review of earlier versions of the manuscript, and Tim Wheeler for assisting in the  
717 laboratory. This work was supported by a National Institutes of Health R35 GM124701 to BSC  
718 and a National Science Foundation Postdoctoral Research Fellowship DBI-2010210 to JDS.  
719 Any opinions, findings, conclusions, or recommendations expressed in this material are those of  
720 the authors(s) and do not necessarily reflect the views of the National Institutes of Health or the  
721 National Science Foundation.

722

## 723 References

- 724 1. Kaur R, Shropshire JD, Cross KL, Leigh B, Mansueto AJ, Stewart V, et al. Living in the  
725 endosymbiotic world of *Wolbachia*: A centennial review. *Cell Host & Microbe*. 2021;0.  
726 doi:10/gkbpkz
- 727 2. Shropshire JD, Leigh B, Bordenstein SR. Symbiont-mediated cytoplasmic incompatibility: what  
728 have we learned in 50 years? *eLife*. 2020;9: e61989. doi:10/ghgtbv
- 729 3. Hoffmann A, Turelli M, Harshman L. Factors affecting the distribution of cytoplasmic  
730 incompatibility in *Drosophila simulans*. *Genetics*. 1990;126: 933–948. doi:10/gkbpn6
- 731 4. Kriesner P, Hoffmann AA, Lee SF, Turelli M, Weeks AR. Rapid sequential spread of two *Wolbachia*  
732 variants in *Drosophila simulans*. *PLOS Pathogens*. 2013;9: e1003607. doi:10/gbdssd
- 733 5. Hoffmann A, Turelli M. in *Influential Passengers: Inherited Microorganisms and Arthropod*  
734 *Reproduction*. Oxford University Press; 1997. pp. 42–80.
- 735 6. Turelli M. Evolution of incompatibility-inducing microbes and their hosts. *Evolution*. 1994;48:  
736 1500–1513. doi:10/gkbpqg
- 737 7. Hunter MS, Perlman SJ, Kelly SE. A bacterial symbiont in the Bacteroidetes induces cytoplasmic  
738 incompatibility in the parasitoid wasp *Encarsia pergandiella*. *Proceedings of the Royal Society B:*  
739 *Biological Sciences*. 2003;270: 2185–2190. doi:10/bdkbg6
- 740 8. Rosenwald LC, Sitvarin MI, White JA. Endosymbiotic Rickettsiella causes cytoplasmic  
741 incompatibility in a spider host. *Proceedings of the Royal Society B: Biological Sciences*. 2020;287:  
742 20201107. doi:10/gkbpqj
- 743 9. Takano S, Gotoh Y, Hayashi T. “Candidatus *Mesenet longicola*”: Novel Endosymbionts of  
744 *Brontispa longissima* that Induce Cytoplasmic Incompatibility. *Microbial Ecology*. 2021.  
745 doi:10/gkbptr
- 746 10. Yen JH, Barr AR. The etiological agent of cytoplasmic incompatibility in *Culex pipiens*. *Journal of*  
747 *Invertebrate Pathology*. 1973;22: 242–250. doi:10/dznftn
- 748 11. Zug R, Hammerstein P. Still a host of hosts for *Wolbachia*: analysis of recent data suggests that  
749 40% of terrestrial arthropod species are infected. *PLOS ONE*. 2012;7: e38544. doi:10/f32jn3
- 750 12. Weinert LA, Araujo-Jnr EV, Ahmed MZ, Welch JJ. The incidence of bacterial endosymbionts in  
751 terrestrial arthropods. *Proc R Soc B*. 2015;282: 20150249. doi:10/ggjc2f
- 752 13. Brownlie JC, Cass BN, Riegler M, Witsenburg JJ, Iturbe-Ormaetxe I, McGraw EA, et al. Evidence for  
753 metabolic provisioning by a common invertebrate endosymbiont, *Wolbachia pipientis*, during  
754 periods of nutritional stress. *PLoS Pathog*. 2009;5: e1000368. doi:10/cchz5m
- 755 14. Hague MTJ, Caldwell CN, Cooper BS. Pervasive Effects of *Wolbachia* on Host Temperature  
756 Preference. *mBio*. 2020;11. doi:10/ghxpqn



- 757 15. Teixeira L, Ferreira A, Ashburner M. The bacterial symbiont *Wolbachia* induces resistance to RNA  
758 viral infections in *Drosophila melanogaster*. PLoS Biol. 2008;6: e2. doi:10/fkkg7f
- 759 16. Weeks AR, Turelli M, Harcombe WR, Reynolds KT, Hoffmann AA. From parasite to mutualist:  
760 Rapid evolution of *Wolbachia* in natural populations of *Drosophila*. PLOS Biology. 2007;5: 997–  
761 1005. doi:10/bnhxkf
- 762 17. Carrington LB, Lipkowitz JR, Hoffmann AA, Turelli M. A re-examination of *Wolbachia*-induced  
763 cytoplasmic incompatibility in California *Drosophila simulans*. PLOS One. 2011;6: e22565.  
764 doi:10/bj2df2
- 765 18. Hague MTJ, Mavengere H, Matute DR, Cooper BS. Environmental and Genetic Contributions to  
766 Imperfect wMel-Like *Wolbachia* Transmission and Frequency Variation. Genetics. 2020;215:  
767 1117–1132. doi:10/gkbppm
- 768 19. Serbus LR, Sullivan W. A cellular basis for *Wolbachia* recruitment to the host germline. PLOS  
769 Pathogens. 2007;3: 1930–1937. doi:10/c72vkk
- 770 20. Cooper BS, Ginsberg PS, Turelli M, Matute DR. *Wolbachia* in the *Drosophila yakuba* complex:  
771 pervasive frequency variation and weak cytoplasmic incompatibility, but no apparent effect on  
772 reproductive isolation. Genetics. 2017;205: 333–351. doi:10/f9s74s
- 773 21. Hoffmann AA, Turelli M, Simmons GM. Unidirectional incompatibility between populations of  
774 *Drosophila simulans*. Evolution. 1986;40: 692–701. doi:10/ggtgbg
- 775 22. Turelli M, Cooper BS, Richardson KM, Ginsberg PS, Peckenpaugh B, Antelope CX, et al. Rapid  
776 global spread of wRi-like *Wolbachia* across multiple *Drosophila*. Current Biology. 2018;28: 963-  
777 971.e8. doi:10/gc3jdj
- 778 23. Turelli M, Hoffmann AA. Cytoplasmic incompatibility in *Drosophila simulans*: dynamics and  
779 parameter estimates from natural populations. Genetics. 1995;140: 1319–1338.
- 780 24. Hoffmann AA. Partial cytoplasmic incompatibility between two Australian populations of  
781 *Drosophila melanogaster*. Entomologia Experimentalis et Applicata. 1988;48: 61–67.  
782 doi:10/bthj43
- 783 25. Reynolds KT, Hoffmann AA. Male age, host effects and the weak expression or non-expression of  
784 cytoplasmic incompatibility in *Drosophila* strains infected by maternally transmitted *Wolbachia*.  
785 Genetical Research. 2002;80: 79–87.
- 786 26. Layton EM, On J, Perlmutter JI, Bordenstein SR, Shropshire JD. Paternal grandmother age affects  
787 the strength of *Wolbachia*-induced cytoplasmic incompatibility in *Drosophila melanogaster*.  
788 mBio. 2019;10. doi:10/gkbpjh
- 789 27. Early AM, Clark AG. Monophyly of *Wolbachia pipientis* genomes within *Drosophila melanogaster*:  
790 geographic structuring, titre variation and host effects across five populations. Molecular Ecology.  
791 2013;22: 5765–5778. doi:10/f5hsgp

- 792 28. Hoffmann AA, Clancy DJ, Merton E. Cytoplasmic incompatibility in Australian populations of  
793 *Drosophila melanogaster*. *Genetics*. 1994;136: 993–999. doi:10/gkbpq6
- 794 29. Ilinsky YuYu, Zakharov IK. The endosymbiont *Wolbachia* in Eurasian populations of *Drosophila*  
795 *melanogaster*. *Russian Journal of Genetics*. 2007;43: 748. doi:10/bz3mv2
- 796 30. Kriesner P, Conner WR, Weeks AR, Turelli M, Hoffmann AA. Persistence of a *Wolbachia* infection  
797 frequency cline in *Drosophila melanogaster* and the possible role of reproductive dormancy.  
798 *Evolution*. 2016;70: 979–997. doi:10/f8tn6t
- 799 31. Webster CL, Waldron FM, Robertson S, Crowson D, Ferrari G, Quintana JF, et al. The Discovery,  
800 Distribution, and Evolution of Viruses Associated with *Drosophila melanogaster*. *PLOS Biology*.  
801 2015;13: e1002210. doi:10/f7p96w
- 802 32. Hoffmann AA, Montgomery BL, Popovici J, Iturbe-Ormaetxe I, Johnson PH, Muzzi F, et al.  
803 Successful establishment of *Wolbachia* in *Aedes* populations to suppress dengue transmission.  
804 *Nature*. 2011;476: 454–457. doi:10/djxxp3
- 805 33. Ross PA, Axford JK, Yang Q, Staunton KM, Ritchie SA, Richardson KM, et al. Heatwaves cause  
806 fluctuations in *wMel Wolbachia* densities and frequencies in *Aedes aegypti*. *PLOS Neglected*  
807 *Tropical Diseases*. 2020;14: e0007958. doi:10/gkbp5
- 808 34. Ross PA, Ritchie SA, Axford JK, Hoffmann AA. Loss of cytoplasmic incompatibility in *Wolbachia*-  
809 infected *Aedes aegypti* under field conditions. *PLOS Neglected Tropical Diseases*. 2019;13:  
810 e0007357. doi:10/gkbpkq
- 811 35. Walker T, Johnson PH, Moreira LA, Iturbe-Ormaetxe I, Frentiu FD, McMeniman CJ, et al. The  
812 *wMel Wolbachia* strain blocks dengue and invades caged *Aedes aegypti* populations. *Nature*.  
813 2011;476: 450–453. doi:10/b8r6hf
- 814 36. Dobson SL, Fox Charles W., Jiggins Francis M. The effect of *Wolbachia*-induced cytoplasmic  
815 incompatibility on host population size in natural and manipulated systems. *Proceedings of the*  
816 *Royal Society of London Series B: Biological Sciences*. 2002;269: 437–445. doi:10/cv466
- 817 37. Lees RS, Gilles JR, Hendrichs J, Vreysen MJ, Bourtzis K. Back to the future: the sterile insect  
818 technique against mosquito disease vectors. *Current Opinion in Insect Science*. 2015;10: 156–  
819 162. doi:10/gfq97f
- 820 38. Nikolouli K, Colinet H, Renault D, Enriquez T, Mouton L, Gibert P, et al. Sterile insect technique  
821 and *Wolbachia* symbiosis as potential tools for the control of the invasive species *Drosophila*  
822 *suzukii*. *Journal of Pest Science*. 2018;91: 489–503. doi:10/gc55cr
- 823 39. O'Connor L, Plichart C, Sang AC, Brelsfoard CL, Bossin HC, Dobson SL. Open release of male  
824 mosquitoes infected with a *Wolbachia* biopesticide: field performance and infection  
825 containment. *PLOS Neglected Tropical Diseases*. 2012;6: e1797. doi:10/f4dkm8
- 826 40. Crawford JE, Clarke DW, Criswell V, Desnoyer M, Cornel D, Deegan B, et al. Efficient production of  
827 male *Wolbachia*-infected *Aedes aegypti* mosquitoes enables large-scale suppression of wild  
828 populations. *Nature Biotechnology*. 2020;38: 482–492. doi:10/gkbppt

- 829 41. O'Neill SL. The use of *Wolbachia* by the World Mosquito Program to interrupt transmission of  
830 *Aedes aegypti* transmitted viruses. *Advances in Experimental Medicine and Biology*. 2018;1062:  
831 355–360. doi:10/gkbpfk
- 832 42. O'Neill SL, Ryan PA, Turley AP, Wilson G, Retzki K, Iturbe-Ormaetxe I, et al. Scaled deployment of  
833 *Wolbachia* to protect the community from dengue and other *Aedes* transmitted arboviruses.  
834 Gates Open Research. 2018;2: 36. doi:10/ggh46h
- 835 43. Breeuwer JA, Werren JH. Cytoplasmic incompatibility and bacterial density in *Nasonia vitripennis*.  
836 *Genetics*. 1993;135: 565–574.
- 837 44. Clark ME, Veneti Z, Bourtzis K, Karr TL. *Wolbachia* distribution and cytoplasmic incompatibility  
838 during sperm development: the cyst as the basic cellular unit of CI expression. *Mechanisms of*  
839 *Development*. 2003;120: 185–198. doi:10/df2xdr
- 840 45. Veneti Z, Clark ME, Zabalou S, Karr TL, Savakis C, Bourtzis K. Cytoplasmic incompatibility and  
841 sperm cyst infection in different *Drosophila-Wolbachia* associations. *Genetics*. 2003;164: 545–  
842 552.
- 843 46. Bordenstein SR, Bordenstein SR. Temperature affects the tripartite interactions between  
844 bacteriophage WO, *Wolbachia*, and cytoplasmic incompatibility. *PLOS One*. 2011;6: e29106.  
845 doi:10/dbggwk
- 846 47. Foo IJ-H, Hoffmann AA, Ross PA. Cross-Generational Effects of Heat Stress on Fitness and  
847 *Wolbachia* Density in *Aedes aegypti* Mosquitoes. *Tropical Medicine and Infectious Disease*.  
848 2019;4. doi:10/gkbpq9
- 849 48. Jia F-X, Yang M-S, Yang W-J, Wang J-J. Influence of continuous high temperature conditions on  
850 *Wolbachia* infection frequency and the fitness of *Liposcelis tricolor* (Psocoptera: Liposcelididae).  
851 *Environmental Entomology*. 2009;38: 1365–1372. doi:10/dqw5jh
- 852 49. Binnington KC, Hoffmann AA. *Wolbachia*-like organisms and cytoplasmic incompatibility in  
853 *Drosophila simulans*. *Journal of Invertebrate Pathology*. 1989;54: 344–352. doi:10/b5thqd
- 854 50. Bressac C, Rousset F. The Reproductive Incompatibility System in *Drosophila simulans*: DAPI-  
855 Staining Analysis of the *Wolbachia* Symbionts in Sperm Cysts. *Journal of Invertebrate Pathology*.  
856 1993;61: 226–230. doi:10/c8hgvj
- 857 51. Clark ME, Veneti Z, Bourtzis K, Karr TL. The distribution and proliferation of the intracellular  
858 bacteria *Wolbachia* during spermatogenesis in *Drosophila*. *Mechanisms of Development*.  
859 2002;111: 3–15. doi:10/dbhf9m
- 860 52. Karr TL, Yang W, Feder ME. Overcoming cytoplasmic incompatibility in *Drosophila*. *Proceedings of*  
861 *the Royal Society B: Biological Sciences*. 1998;265: 391–395. doi:10/dfzj8m
- 862 53. LePage DP, Metcalf JA, Bordenstein SR, On J, Perlmutter JI, Shropshire JD, et al. Prophage WO  
863 genes recapitulate and enhance *Wolbachia*-induced cytoplasmic incompatibility. *Nature*.  
864 2017;543: 243–247. doi:10/f9s35z

- 865 54. Beckmann J, Ronau JA, Hochstrasser M. A *Wolbachia* deubiquitylating enzyme induces  
866 cytoplasmic incompatibility. *Nature Microbiology*. 2017;2: 17007. doi:10/f9s5m7
- 867 55. Chen H, Ronau JA, Beckmann J, Hochstrasser M. A *Wolbachia* nuclease and its binding partner  
868 provide a distinct mechanism for cytoplasmic incompatibility. *Proceedings of the National*  
869 *Academy of Sciences*. 2019;116: 22314–22321. doi:10/gkbptp
- 870 56. Shropshire JD, Rosenberg R, Bordenstein SR. The impacts of cytoplasmic incompatibility factor  
871 (*cifA* and *cifB*) genetic variation on phenotypes. *Genetics*. 2021;217: 1–13. doi:10/gkbpfv
- 872 57. Shropshire JD, Bordenstein SR. Two-by-one model of cytoplasmic incompatibility: synthetic  
873 recapitulation by transgenic expression of *cifA* and *cifB* in *Drosophila*. *PLOS Genetics*. 2019;15:  
874 e1008221. doi:10/gkbpdw
- 875 58. Shropshire JD, On J, Layton EM, Zhou H, Bordenstein SR. One prophage WO gene rescues  
876 cytoplasmic incompatibility in *Drosophila melanogaster*. *Proceedings of the National Academy of*  
877 *Sciences*. 2018;115: 4987–4991. doi:10/gdcdff
- 878 59. Nasehi SF, Fathipour Y, Asgari S, Mehrabadi M. Environmental Temperature, but Not Male Age,  
879 Affects *Wolbachia* and Prophage WO Thereby Modulating Cytoplasmic Incompatibility in the  
880 Parasitoid Wasp, *Habrobracon Hebetor*. *Microbial Ecology*. 2021. doi:10/gjxss6
- 881 60. Bordenstein SR, Marshall ML, Fry AJ, Kim U, Wernegreen JJ. The tripartite associations between  
882 bacteriophage, *Wolbachia*, and arthropods. *PLOS Pathogens*. 2006;2: 384–393. doi:10/cht4w8
- 883 61. Masui S, Kamoda S, Sasaki T, Ishikawa H. Distribution and evolution of bacteriophage WO in  
884 *Wolbachia*, the endosymbiont causing sexual alterations in arthropods. *Journal of Molecular*  
885 *Evolution*. 2000;51: 491–497. doi:10/bx9ngt
- 886 62. Wright J, Sjostrand F, Portaro J, Barr A. Ultrastructure of Rickettsia-like microorganism *Wolbachia*  
887 *pipientis* and associated virus-like bodies in mosquito *Culex pipiens*. *Journal of Ultrastructure*  
888 *Research*. 1978;63: 79–85. doi:10/bsrtxv
- 889 63. Chrostek E, Marialva MSP, Esteves SS, Weinert LA, Martinez J, Jiggins FM, et al. *Wolbachia*  
890 variants induce differential protection to viruses in *Drosophila melanogaster*: a phenotypic and  
891 phylogenomic analysis. *PLOS Genetics*. 2013;9: e1003896. doi:10/f5qbgk
- 892 64. Duarte EH, Carvalho A, Lopez-Madrugal S, Teixeira L. Regulation of *Wolbachia* proliferation by the  
893 amplification and deletion of an addictive genomic island. *bioRxiv*. 2020; 2020.09.08.288217.  
894 doi:10/gkbpfn
- 895 65. Hornett EA, Charlat S, Duploux AMR, Davies N, Roderick GK, Wedell N, et al. Evolution of Male-  
896 Killer Suppression in a Natural Population. *PLOS Biology*. 2006;4: e283. doi:10/d4pwk4
- 897 66. Vanthournout B, Hendrickx F. Hidden suppression of sex ratio distortion suggests Red queen  
898 dynamics between *Wolbachia* and its dwarf spider host. *Journal of Evolutionary Biology*. 2016;29:  
899 1488–1494. doi:10/f82pk6

- 900 67. Poinso D, Bourtzis K, Markakis G, Savakis C, Mercot H. *Wolbachia* transfer from *Drosophila*  
901 *melanogaster* into *D. simulans*: Host effect and cytoplasmic incompatibility relationships.  
902 Genetics. 1998;150: 227–237. doi:10/gkbpvv
- 903 68. Funkhouser-Jones LJ, Opstal EJ van, Sharma A, Bordenstein SR. The Maternal Effect Gene *Wds*  
904 Controls *Wolbachia* Titer in *Nasonia*. Current Biology. 2018;0. doi:10/gdg6rg
- 905 69. Lu P, Bian G, Pan X, Xi Z. *Wolbachia* induces density-dependent inhibition to dengue virus in  
906 mosquito cells. PLOS Neglected Tropical Diseases. 2012;6: e1754. doi:10/f3469r
- 907 70. Awrahman ZA, Champion de Crespigny F, Wedell N. The impact of *Wolbachia*, male age and  
908 mating history on cytoplasmic incompatibility and sperm transfer in *Drosophila simulans*. Journal  
909 of Evolutionary Biology. 2014;27: 1–10. doi:10/f5m9sn
- 910 71. De Crespigny FEC, Pitt TD, Wedell N. Increased male mating rate in *Drosophila* is associated with  
911 *Wolbachia* infection. Journal of Evolutionary Biology. 2006;19: 1964–1972. doi:10/cgkd5x
- 912 72. Yamada R, Floate KD, Riegler M, O’Neill SL. Male development time influences the strength of  
913 *Wolbachia*-induced cytoplasmic incompatibility expression in *Drosophila melanogaster*. Genetics.  
914 2007;177: 801–808. doi:10/fc8mmh
- 915 73. Clancy DJ, Hoffmann AA. Environmental effects on cytoplasmic incompatibility and bacterial load  
916 in *Wolbachia*-infected *Drosophila simulans*. Entomologia Experimentalis et Applicata. 1998;86:  
917 13–24. doi:10/c8rj52
- 918 74. Meany MK, Conner WR, Richter SV, Bailey JA, Turelli M, Cooper BS. Loss of cytoplasmic  
919 incompatibility and minimal fecundity effects explain relatively low *Wolbachia* frequencies in  
920 *Drosophila mauritiana*. Evolution. 2019 [cited 16 Aug 2019]. doi:10/gkbpks
- 921 75. Kern AD, Barbash DA, Chang Mell J, Hupalo D, Jensen A. Highly constrained intergenic *Drosophila*  
922 ultraconserved elements are candidate ncRNAs. Genome Biology and Evolution. 2015;7: 689–  
923 698. doi:10/f7c4v8
- 924 76. Lindsey A, Rice DW, Bordenstein SR, Brooks AW, Bordenstein SR, Newton ILG. Evolutionary  
925 genetics of cytoplasmic incompatibility genes *cifA* and *cifB* in prophage WO of *Wolbachia*.  
926 Genome Biology and Evolution. 2018;10: 434–451. doi:10/gcvmkm
- 927 77. Bing X-L, Zhao D-S, Sun J-T, Zhang K-J, Hong X-Y. Genomic analysis of *Wolbachia* from *Laodelphax*  
928 *striatellus* (Delphacidae, Hemiptera) reveals insights into its “Jekyll and Hyde” mode of infection  
929 pattern. Genome Biology and Evolution. 2020. doi:10/gkbpnf
- 930 78. Martinez J, Klasson L, Welch JJ, Jiggins FM. Life and death of selfish genes: comparative genomics  
931 reveals the dynamic evolution of cytoplasmic incompatibility. Molecular Biology and Evolution.  
932 2020. doi:10/gjfqg8
- 933 79. Bordenstein SR, Bordenstein SR. Eukaryotic association module in phage WO genomes from  
934 *Wolbachia*. Nature Communications. 2016;7: 13155. doi:10/f87pxk

- 935 80. Chrostek E, Teixeira L. Mutualism breakdown by amplification of *Wolbachia* genes. PLOS Biology. 936 2015;13: e1002065. doi:10/f635j3
- 937 81. Myllymäki H, Valanne S, Rämetsä M. The *Drosophila* Imd Signaling Pathway. The Journal of 938 Immunology. 2014;192: 3455–3462. doi:10/f5xwg8
- 939 82. Clark ME, Karr TL. Distribution of *Wolbachia* within *Drosophila* reproductive tissue: implications 940 for the expression of cytoplasmic incompatibility. Integrative and comparative biology. 2002;42: 941 332–339. doi:10/dh49bd
- 942 83. Doremus MR, Stouthamer CM, Kelly SE, Schmitz-Esser S, Hunter MS. *Cardinium* Localization 943 During Its Parasitoid Wasp Host's Development Provides Insights Into Cytoplasmic 944 Incompatibility. Frontiers in Microbiology. 2020;11. doi:10/gkbpr9
- 945 84. Doremus MR, Kelly SE, Hunter MS. Exposure to opposing temperature extremes causes 946 comparable effects on *Cardinium* density but contrasting effects on *Cardinium*-induced 947 cytoplasmic incompatibility. PLOS Pathogens. 2019;15: e1008022. doi:10/gkbpbb
- 948 85. Graveley BR, Brooks AN, Carlson JW, Duff MO, Landolin JM, Yang L, et al. The Developmental 949 Transcriptome of *Drosophila melanogaster*. Nature. 2011;471: 473–479. doi:10/dzqgmd
- 950 86. Kaur R, Martinez J, Rota-Stabelli O, Jiggins FM, Miller WJ. Age, tissue, genotype and virus 951 infection regulate *Wolbachia* levels in *Drosophila*. Molecular Ecology. 2020;29. doi:10/ghfj5g
- 952 87. Hotopp JCD, Lin M, Madupu R, Crabtree J, Angiuoli SV, Eisen J, et al. Comparative Genomics of 953 Emerging Human Ehrlichiosis Agents. PLOS Genetics. 2006;2: e21. doi:10/fmsmg5
- 954 88. Vollmer J, Schiefer A, Schneider T, Jülicher K, Johnston KL, Taylor MJ, et al. Requirement of lipid II 955 biosynthesis for cell division in cell wall-less *Wolbachia*, endobacteria of arthropods and filarial 956 nematodes. International journal of medical microbiology: IJMM. 2013;303: 140–149. 957 doi:10/f4smsg
- 958 89. Louis C, Nigro L. Ultrastructural evidence of *Wolbachia* rickettsiales in *Drosophila simulans* and 959 their relationships with unidirectional cross-incompatibility. Journal of Invertebrate Pathology. 960 1989;54: 39–44. doi:10/cj75mb
- 961 90. Bian G, Xu Y, Lu P, Xie Y, Xi Z. The endosymbiotic bacterium *Wolbachia* induces resistance to 962 dengue virus in *Aedes aegypti*. PLOS Pathogens. 2010;6: e1000833. doi:10/d33jr5
- 963 91. Kambris Z, Cook PE, Phuc HK, Sinkins SP. Immune activation by life-shortening *Wolbachia* and 964 reduced filarial competence in mosquitoes. Science. 2009;326: 134–136. doi:10/bwf6sx
- 965 92. Moreira LA, Iturbe-Ormaetxe I, Jeffery JA, Lu G, Pyke AT, Hedges LM, et al. A *Wolbachia* symbiont 966 in *Aedes aegypti* limits infection with dengue, Chikungunya, and Plasmodium. Cell. 2009;139: 967 1268–1278. doi:10/c2jm62
- 968 93. Xi Z, Gavotte L, Xie Y, Dobson SL. Genome-wide analysis of the interaction between the 969 endosymbiotic bacterium *Wolbachia* and its *Drosophila* host. BMC Genomics. 2008;9: 1. 970 doi:10/bb6h53



- 971 94. Bourtzis K, Pettigrew MM, O'Neill SL. *Wolbachia* neither induces nor suppresses transcripts  
972 encoding antimicrobial peptides. *Insect molecular biology*. 2000;9: 635–639.
- 973 95. Rancès E, Johnson TK, Popovici J, Iturbe-Ormaetxe I, Zakir T, Warr CG, et al. The toll and Imd  
974 pathways are not required for *Wolbachia*-mediated dengue virus interference. *Journal of*  
975 *Virology*. 2013;87: 11945–11949. doi:10/gkbpfn
- 976 96. Wong ZS, Hedges LM, Brownlie JC, Johnson KN. *Wolbachia*-mediated antibacterial protection and  
977 immune gene regulation in *Drosophila*. *PLOS One*. 2011;6: e25430. doi:10/bdfqsh
- 978 97. Zhang Y-K, Ding X-L, Rong X, Hong X-Y. How do hosts react to endosymbionts? A new insight into  
979 the molecular mechanisms underlying the *Wolbachia*-host association. *Insect Molecular Biology*.  
980 2015;24: 1–12. doi:10/f6wjxc
- 981 98. Broderick NA, Buchon N, Lemaitre B. Microbiota-induced changes in *Drosophila melanogaster*  
982 host gene expression and gut morphology. *mBio*. 2014;5: e01117-01114. doi:10/ghkqnf
- 983 99. Buchon N, Broderick NA, Chakrabarti S, Lemaitre B. Invasive and indigenous microbiota impact  
984 intestinal stem cell activity through multiple pathways in *Drosophila*. *Genes & Development*.  
985 2009;23: 2333–2344. doi:10/bhdwhb
- 986 100. Guo L, Karpac J, Tran SL, Jasper H. PGRP-SC2 promotes gut immune homeostasis to limit  
987 commensal dysbiosis and extend lifespan. *Cell*. 2014;156: 109–122. doi:10/f5pkm9
- 988 101. Ha E-M, Lee K-A, Park SH, Kim S-H, Nam H-J, Lee H-Y, et al. Regulation of DUOX by the Galphaq-  
989 phospholipase C $\beta$ -Ca $^{2+}$  pathway in *Drosophila* gut immunity. *Developmental Cell*. 2009;16:  
990 386–397. doi:10/b46996
- 991 102. Landis GN, Abdueva D, Skvortsov D, Yang J, Rabin BE, Carrick J, et al. Similar gene expression  
992 patterns characterize aging and oxidative stress in *Drosophila melanogaster*. *Proceedings of the*  
993 *National Academy of Sciences*. 2004;101: 7663–7668. doi:10/dzgsxw
- 994 103. Pletcher SD, Macdonald SJ, Marguerie R, Certa U, Stearns SC, Goldstein DB, et al. Genome-Wide  
995 Transcript Profiles in Aging and Calorically Restricted *Drosophila melanogaster*. *Current Biology*.  
996 2002;12: 712–723. doi:10/fpjg2k
- 997 104. Seroude L, Brummel T, Kapahi P, Benzer S. Spatio-temporal analysis of gene expression during  
998 aging in *Drosophila melanogaster*. *Aging Cell*. 2002;1: 47–56. doi:10/bth6sv
- 999 105. Clark RI, Salazar A, Yamada R, Fitz-Gibbon S, Morselli M, Alcaraz J, et al. Distinct Shifts in  
1000 Microbiota Composition during *Drosophila* Aging Impair Intestinal Function and Drive Mortality.  
1001 *Cell Reports*. 2015;12: 1656–1667. doi:10/gkbpqm
- 1002 106. Mistry R, Kounatidis I, Ligoxygakis P. Interaction Between Familial Transmission and a  
1003 Constitutively Active Immune System Shapes Gut Microbiota in *Drosophila melanogaster*.  
1004 *Genetics*. 2017;206: 889–904. doi:10/gbh694
- 1005 107. Ren C, Webster P, Finkel SE, Tower J. Increased Internal and External Bacterial Load during  
1006 *Drosophila* Aging without Life-Span Trade-Off. *Cell Metabolism*. 2007;6: 144–152. doi:10/bmqhnb

- 1007 108. Buchon N, Silverman N, Cherry S. Immunity in *Drosophila melanogaster*--from microbial  
1008 recognition to whole-organism physiology. *Nature Reviews Immunology*. 2014;14: 796–810.  
1009 doi:10/f6qs8g
- 1010 109. Hoffmann AA, Hercus M, Dagher H. Population dynamics of the *Wolbachia* infection causing  
1011 cytoplasmic incompatibility in *Drosophila melanogaster*. *Genetics*. 1998;148: 221–231.  
1012 doi:10/gkbpjd
- 1013 110. Schuler H, Köppler K, Daxböck-Horvath S, Rasool B, Krumböck S, Schwarz D, et al. The hitchhiker’s  
1014 guide to Europe: the infection dynamics of an ongoing *Wolbachia* invasion and mitochondrial  
1015 selective sweep in *Rhagoletis cerasi*. *Molecular Ecology*. 2016;25: 1595–1609. doi:10/f3s255
- 1016 111. Wheeler TB, Thompson V, Conner WR, Cooper BS. *Wolbachia* in the spittlebug *Prosapia*  
1017 *ignipectus*: Variable infection frequencies, but no apparent effect on host reproductive isolation.  
1018 bioRxiv. 2021; 2021.02.25.432892. doi:10/gkbp6c
- 1019 112. Cooper BS, Vanderpool D, Conner WR, Matute DR, Turelli M. *Wolbachia* acquisition by *Drosophila*  
1020 *yakuba*-clade hosts and transfer of incompatibility loci between distantly related *Wolbachia*.  
1021 *Genetics*. 2019. doi:10/ggh6t7
- 1022 113. Ballard JWO, Melvin RG. Tetracycline treatment influences mitochondrial metabolism and mtDNA  
1023 density two generations after treatment in *Drosophila*. *Insect Molecular Biology*. 2007;16: 799–  
1024 802. doi:10/fprwnc
- 1025 114. Köressaar T, Lepamets M, Kaplinski L, Raime K, Andreson R, Remm M. Primer3\_masker:  
1026 integrating masking of template sequence with primer design software. *Bioinformatics*. 2018;34:  
1027 1937–1938. doi:10/gdmgg8
- 1028 115. Hu Y, Sopko R, Foos M, Kelley C, Flockhart I, Ammeux N, et al. FlyPrimerBank: an online database  
1029 for *Drosophila melanogaster* gene expression analysis and knockdown evaluation of RNAi  
1030 reagents. *G3*. 2013;3: 1607–1616. doi:10/gkbpnt
- 1031 116. Hu Y, Comjean A, Perrimon N, Mohr S. The *Drosophila* Gene Expression Tool (DGET) for  
1032 expression analyses. *BMC Bioinformatics*. 2017;18: 98. doi:10/gkbp4
- 1033 117. R Core Team. R: A Language and Environment for Statistical Computing. Vienna, Austria: R  
1034 Foundation for Statistical Computing; 2020. Available: <https://www.R-project.org/>
- 1035 118. Kassambara A. ggpubr: “ggplot2” Based Publication Ready Plots. 2020. Available: [https://CRAN.R-](https://CRAN.R-project.org/package=ggpubr)  
1036 [project.org/package=ggpubr](https://CRAN.R-project.org/package=ggpubr)
- 1037 119. Signorell A. Tools for Descriptive Statistics [R package DescTools version 0.99.41]. Comprehensive  
1038 R Archive Network (CRAN); 2021. Available: <https://CRAN.R-project.org/package=DescTools>
- 1039 120. Canty A, Ripley BD. boot: Bootstrap R (S-Plus) Functions. 2021.
- 1040 121. Wickham H. ggplot2: Elegant Graphics for Data Analysis. Springer-Verlag New York; 2016.  
1041 Available: <https://ggplot2.tidyverse.org>





1043 **Supporting Information**

1044

1045

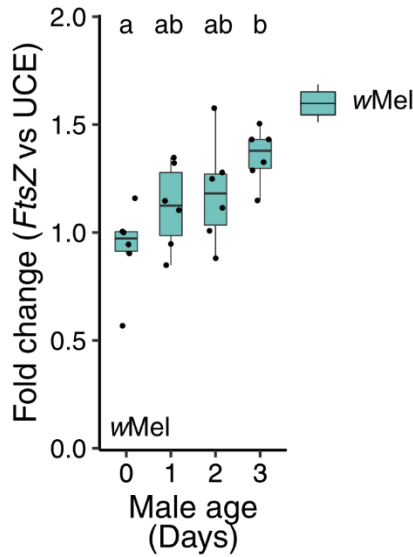

1046

1047 **Figure S1. Testing the bacterial density model for CI strength variation in young *wMel*-**  
1048 **infected *D. melanogaster*.** Fold change across male age for *wMel* *FtsZ* relative to *D.*  
1049 *melanogaster* UCE. Letters above data represent statistically significant differences based on  
1050  $\alpha=0.05$  calculated by Kruskal-Wallis and Dunn's test for multiple comparisons between all  
1051 groups—crosses that do not share a letter are significantly different. Fold change was  
1052 calculated as  $2^{-\Delta\Delta\text{Cq}}$ . *P*-values are reported in Table S1.

1053

1054

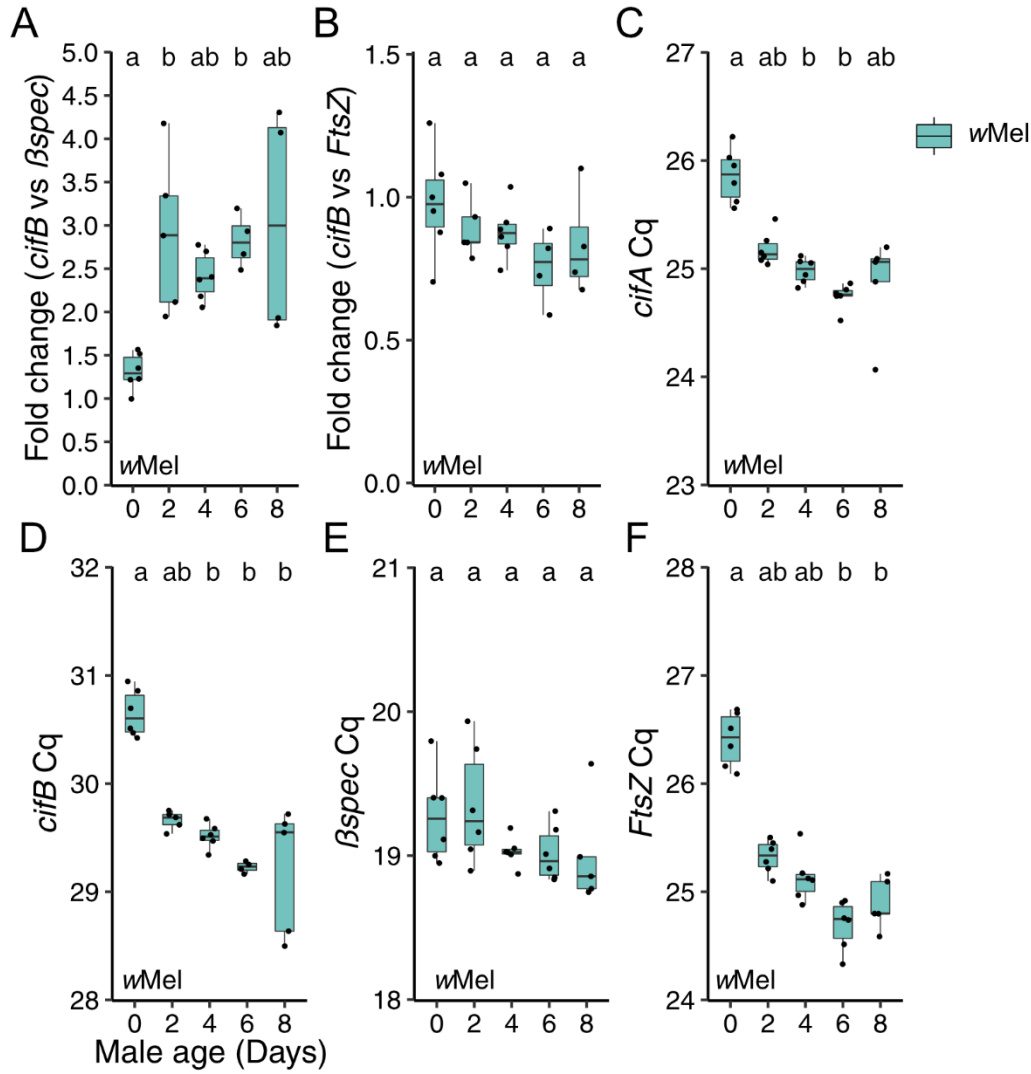

1055

1056 **Figure S2. Testing the *cif* expression hypothesis for wMel CI strength variation.** Fold  
 1057 change across male age for the relative expression of (A) *cifB*<sub>wMel[T1]</sub> to *D. melanogaster*  $\beta$ spec  
 1058 and (B) *cifB*<sub>wMel[T1]</sub> to wMel *FtsZ*. Raw C<sub>q</sub> values for (C) *cifA*<sub>wMel[T1]</sub>, (D) *cifB*<sub>wMel[T1]</sub>, (E) *D.*  
 1059 *melanogaster*  $\beta$ spec, and (F) wMel *FtsZ*. Letters above data represent statistically significant  
 1060 differences based on  $\alpha=0.05$  calculated by Kruskal-Wallis and Dunn's test for multiple  
 1061 comparisons between all groups—crosses that do not share a letter are significantly different.  
 1062 Fold change was calculated as  $2^{-\Delta\Delta Cq}$ . *P*-values are reported in Table S1.

1063

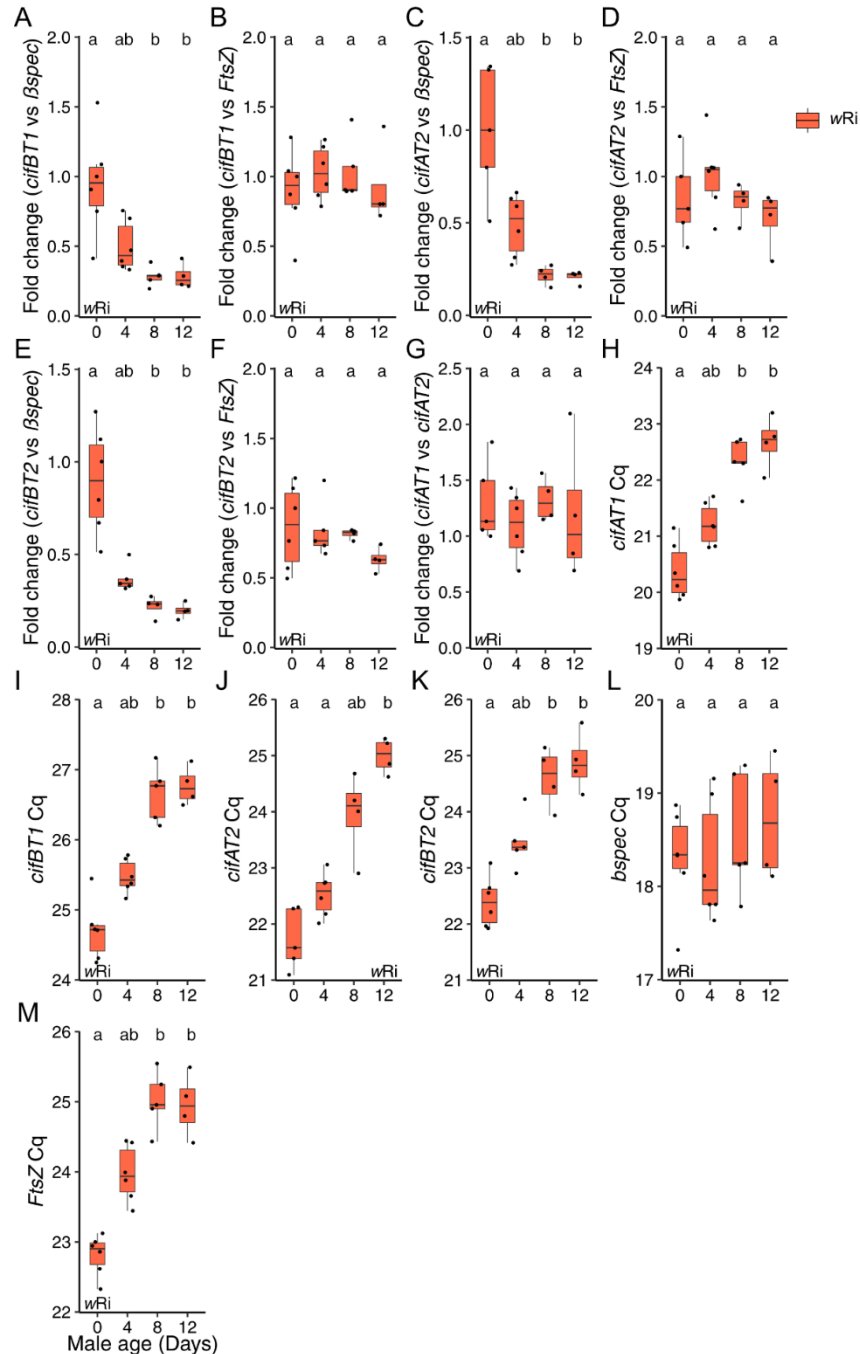

1064

1065 **Figure S3. Testing the *cif* expression hypothesis for wRi CI strength variation.** Fold  
 1066 change across male age for the relative expression of (A) *cifB*<sub>wRi[T1]</sub> to *D. simulans*  $\beta$ spec, (B)  
 1067 *cifB*<sub>wRi[T1]</sub> to wRi *FtsZ*, (C) *cifA*<sub>wRi[T2]</sub> to *D. simulans*  $\beta$ spec, (D) *cifA*<sub>wRi[T2]</sub> to wRi *FtsZ*, (E) *cifB*<sub>wRi[T2]</sub>  
 1068 to *D. simulans*  $\beta$ spec, (F) *cifB*<sub>wRi[T2]</sub> to wRi *FtsZ*, and (G) *cifA*<sub>wRi[T1]</sub> to *cifA*<sub>wRi[T2]</sub>. Raw C<sub>q</sub> values for  
 1069 (H) *cifA*<sub>wRi[T1]</sub>, (I) *cifB*<sub>wRi[T1]</sub>, (J) *cifA*<sub>wRi[T2]</sub>, (K) *cifB*<sub>wRi[T2]</sub>, (L) *D. simulans*  $\beta$ spec, and (M) wRi *FtsZ*.  
 1070 Letters above data represent statistically significant differences based on  $\alpha=0.05$  calculated by  
 1071 Kruskal-Wallis and Dunn's test for multiple comparisons between all groups—crosses that do

1072 not share a letter are significantly different. Fold change was calculated as  $2^{-\Delta\Delta Cq}$ . *P*-values are  
 1073 reported in Table S1.

1074

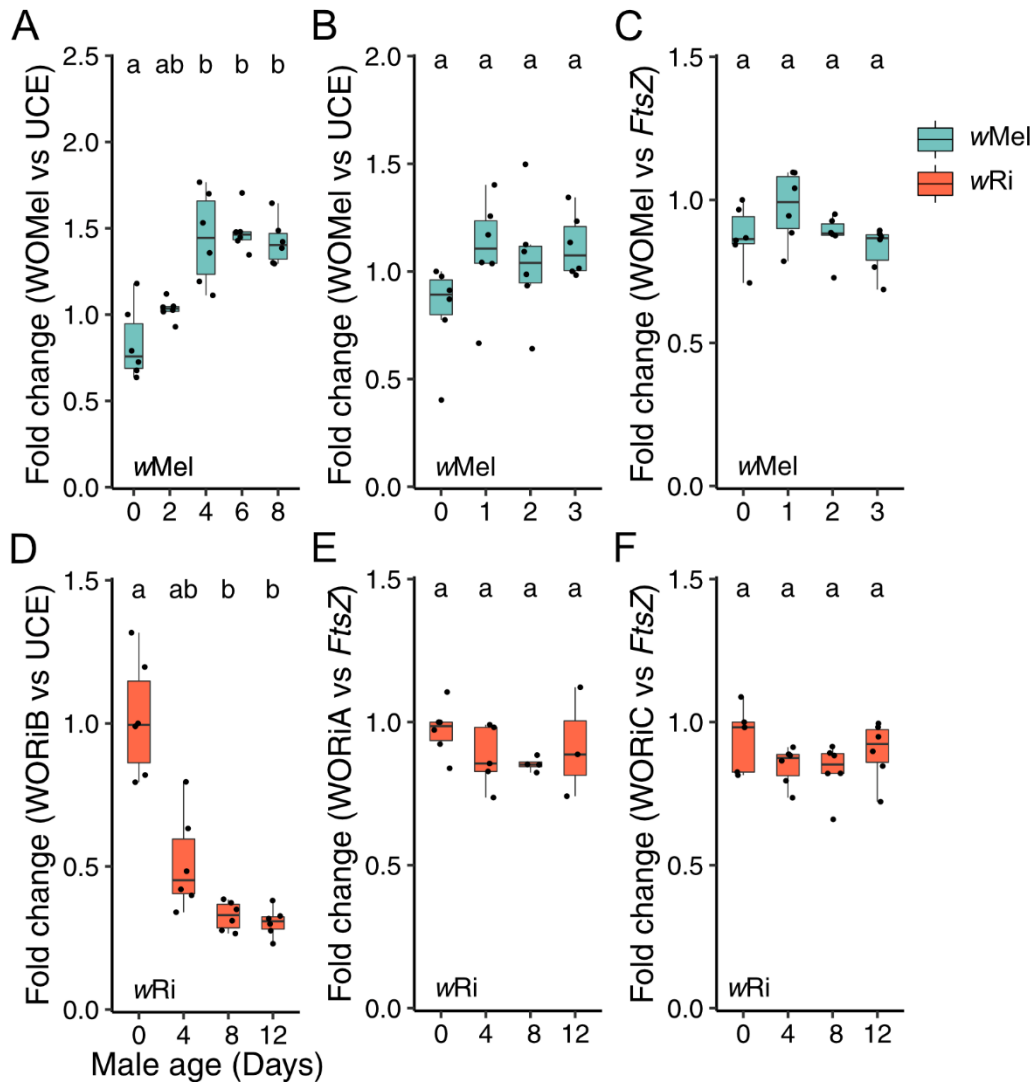

1075

1076 **Figure S4. Testing the phage density model for *Wolbachia* density variation.** Fold change  
 1077 across male age for the relative abundance of (A) WOMelA/B to *D. melanogaster* UCE in the  
 1078 old age cohort, (B) WOMelA/B to *D. melanogaster* UCE in the young age cohort, (C) WOMelA/B  
 1079 to wMel *FtsZ* in the young age cohort, (D) WORiB to *D. simulans* UCE, (E) WORiA to wRi *FtsZ*,  
 1080 and (F) WORiC to wRi *FtsZ*. Letters above data represent statistically significant differences  
 1081 based on  $\alpha=0.05$  calculated by Kruskal-Wallis and Dunn's test for multiple comparisons  
 1082 between all groups—crosses that do not share a letter are significantly different. Fold change  
 1083 was calculated as  $2^{-\Delta\Delta Cq}$ . *P*-values are reported in Table S1.

1084

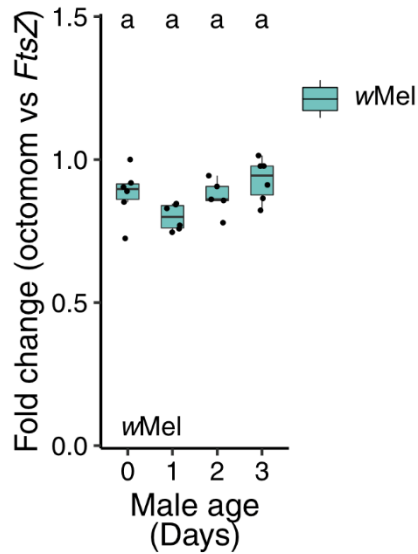

1085

1086 **Figure S5. Testing the Octomom copy number hypothesis for wMel density variation in**  
1087 **young wMel-infected *D. melanogaster*.** Fold change across male age for the relative  
1088 abundance of Octomom gene WD0509 to wMel *FtsZ* in the young cohort. Letters above data  
1089 represent statistically significant differences based on  $\alpha=0.05$  calculated by Kruskal-Wallis and  
1090 Dunn's test for multiple comparisons between all groups—crosses that do not share a letter are  
1091 significantly different. Fold change was calculated as  $2^{-\Delta\Delta\text{Cq}}$ . *P*-values are reported in Table S1.

1092
